# Supplementary material for: A preoperative nomogram for sepsis in percutaneous nephrolithotomy treating solitary, unilateral and proximal ureteral stones
Source: PeerJ. 2020 Jun 29;8:e9435. doi: 10.7717/peerj.9435 (PMC7331651; doi:10.7717/peerj.9435)
Supplement: Supplemental Information 1 [file peerj-08-9435-s001.xlsx]

## Sheet: Sheet1
ID	sex	age	stone diameter	laterality(1=R,0=L)	fever	stent	coronary heart disease	hypertension	immune suppression	diabetes	hydronephrosis	albumin	globulin	AGR	urine culture	critinine	cholesterol	WBC	N	L	RBC	Hb	uWBC	urine nitrite	ASA	height	weight	BMI	sepsis
1	0	56	6	1	0	0	0	1	0	0	0	40.4	27.9	1.44803	1	72	4.44	4.76	2.11	2.04	4.38	128	185.3	0	2	160	47	18.3594	0
2	1	44	10	1	0	1	0	0	0	0	0	32.4	34.2	0.947368	0	111	2.75	4.72	3	1.59	3.53	108	62.7	0	2	164	60	22.3081	0
3	1	35	12	0	0	0	0	0	0	0	1	41.5	26.7	1.55431	0	110	4.67	9.28	4.42	3.9	5.1	142	8.5	0	2	173	76	25.3934	0
4	1	56	9	0	0	0	0	0	0	0	1	39.8	22.6	1.76106	0	115	4.31	5.59	3.06	1.56	4.35	130	21.8	0	2	168	59	20.9042	0
5	1	56	14	1	0	0	0	0	0	0	0	40.8	22.5	1.81333	0	84	3.78	6.31	3.53	1.89	3.95	128	53.6	0	2	175	63	20.5714	0
6	0	61	9	0	0	0	0	0	0	0	0	42.5	31.2	1.36218	0	51	5.21	3.72	2.33	1.01	4.16	126	1.5	0	2	162	64	24.3865	0
7	0	23	13	1	0	0	0	0	0	0	0	42.3	26	1.62692	0	52	3.89	4.97	2.36	2.14	3.98	120	67	0	1	152	49	21.2084	0
8	0	46	7	1	0	0	0	1	0	0	0	45.7	34.6	1.32081	1	96	4.06	10.12	6.78	2.7	4.25	124	286.7	0	2	155	70	29.1363	1
9	0	66	13	1	0	0	0	1	0	0	1	38.4	28.9	1.32872	0	61	4.31	3.42	1.45	1.41	4.37	128	270.1	0	2	154	60	25.2994	0
10	1	47	15	0	0	0	0	0	0	0	0	42	25.6	1.64062	0	60	4.79	6.69	2.77	3.2	4.84	152	120.2	0	2	170	60	20.7612	0
11	0	31	10	0	1	0	0	0	0	0	0	31.2	41.2	0.757282	0	81	2.92	6.49	3.86	1.94	3.37	101	4047.4	0	2	157	45	18.2563	0
12	1	44	10	1	0	0	0	0	0	0	0	39.7	24.6	1.61382	0	93	4.39	6.76	3.96	1.9	3.96	127	89.6	0	2	178	75	23.6713	0
13	1	75	7	1	0	0	0	0	0	0	0	44.1	24.1	1.82988	0	77	4.49	6.71	3.9	2	3.96	133	27.1	0	2	168	64	22.6757	0
14	0	46	11	0	0	0	0	0	0	0	0	48.8	27	1.80741	0	47	4.1	5.55	3.15	2.07	4.06	133	90.8	0	1	155	57.5	23.9334	0
15	0	39	6	1	0	0	0	0	0	0	0	41.8	24.6	1.69919	1	62	3.62	6.12	3.14	2.32	4.32	136	4885.7	1	1	155	45	18.7305	0
16	1	44	9	1	0	0	0	0	0	0	0	48.1	25	1.924	0	93	3.35	5.55	3.18	1.76	4.63	141	8.8	0	2	174	85	28.075	0
17	0	49	15	1	0	0	0	0	0	0	0	41.7	30.8	1.3539	0	62	4.69	6.6	3.89	1.66	3.81	115	187	0	1	150	50	22.2222	0
18	1	57	8	1	0	0	0	0	0	0	0	39.5	28.3	1.39576	0	116	6.24	10.22	6.18	3.05	5.28	154	118.9	0	1	165	68	24.977	0
19	1	50	4	1	0	1	0	1	0	1	0	42	37.2	1.12903	1	90	3.51	8.38	5.38	1.91	4.87	152	220.3	0	2	170	93	32.1799	0
20	0	27	22	1	0	0	0	0	0	0	0	41.9	26.2	1.59924	0	59	3.14	5.66	3.24	2.05	3.96	116	28.3	0	1	158	60	24.0346	0
21	1	53	12	1	0	0	0	1	0	0	0	43.5	22.3	1.95067	0	104	3.52	6.36	3.77	1.95	3.84	131	201	0	2	173	74	24.7252	0
22	1	57	9	1	0	0	0	0	0	0	0	43.6	27.3	1.59707	0	97	4.39	7.14	4.97	1.33	5.09	158	23.2	0	1	170	62	21.4533	0
23	1	61	10	1	0	0	0	1	0	0	0	44.5	21.3	2.0892	0	96	4.64	5.47	2.96	1.81	4.18	144	46.6	0	1	168	65	23.03	0
24	0	62	13	1	0	0	0	1	0	1	0	41.1	21.2	1.93868	0	52	5.49	5.61	2.76	2.03	4.08	119	77.6	0	1	160	60	23.4375	0
25	1	48	11	0	0	0	0	0	0	0	0	47.2	29.3	1.61092	0	166	2.78	5.78	3.72	1.46	2.64	83	6.4	0	1	168	75	26.5731	0
26	0	39	9	1	0	0	0	0	0	0	0	46.3	30.2	1.53311	0	80	4.79	9.19	6.83	1.68	4.4	120	43	0	1	163	63	23.7118	0
27	0	50	7	0	0	0	0	0	0	0	0	43.1	23.9	1.80335	0	46	3.74	4.27	2.22	1.66	3.69	105	42.6	0	2	156	52	21.3675	0
28	1	61	25	1	0	1	0	0	0	1	1	39.1	27.4	1.42701	1	278	2.29	6.12	3.81	1.62	3.53	114	1300.9	0	2	174	69	22.7903	0
29	0	62	13	1	0	0	0	1	0	0	1	41.4	40.7	1.0172	0	109	4.89	7.71	4.91	1.85	3.49	103	1386.7	0	2	165	80	29.3848	0
30	0	65	6	1	0	0	0	0	0	0	0	39.7	35.2	1.12784	0	98	4.43	6.14	4.28	1.24	3.2	91	20.4	0	2	166	50	18.1449	0
31	1	77	7	0	0	0	0	0	0	0	1	40.4	37.1	1.08895	0	144	4.59	9.62	6.73	1.2	4.35	133	25.9	0	2	163	65	24.4646	0
32	1	79	17	0	0	0	0	0	0	0	1	40.3	27	1.49259	0	75	4.5	4.42	2.66	1.12	3.94	127	12.9	0	2	163	60	22.5827	0
33	1	37	21	1	0	0	0	0	0	0	0	42	31.2	1.34615	0	70	4.6	6.4	3.98	1.94	4.45	138	33.7	0	1	170	68	23.5294	0
34	0	37	10	1	0	0	0	1	0	0	0	30.8	36.9	0.834688	0	229	3.21	8.79	5.9	2.22	4.21	121	19.1	0	2	155	62	25.8065	0
35	0	71	20	0	0	0	0	0	0	0	0	32.2	36.7	0.877384	0	505	2.84	13.41	11.94	0.77	3.45	98	55.5	0	2	150	57	25.3333	1
36	1	65	8	1	0	0	0	0	0	0	0	39	27.4	1.42336	0	106	3.9	8.04	5.29	1.6	4.87	156	8.4	0	2	165	63	23.1405	0
37	0	60	10	1	0	0	0	0	0	0	0	41	26.5	1.54717	0	113	4.02	3.47	2.22	0.81	4.46	131	65	0	2	159	69	27.2932	0
38	1	40	8	0	0	0	0	0	0	0	0	44	36.7	1.19891	0	69	3.56	7.05	3.5	2.86	4.88	133	11	0	2	170	90	31.1419	0
39	1	30	12	0	0	0	0	0	0	0	0	46.3	28.7	1.61324	0	75	4.22	6.11	4.03	1.43	5.03	149	52.4	0	1	180	80	24.6914	0
40	1	46	10	0	0	0	0	0	0	0	1	33.5	33.9	0.988201	0	114	3.33	12.4	9.41	1.53	3.75	112	10	0	2	168	60	21.2585	0
41	0	50	10	0	0	0	0	1	0	0	0	42.4	23.7	1.78903	0	97	4.95	5.24	2.4	2.39	4.07	122	104.4	0	2	155	52	21.6441	0
42	0	45	10	0	0	1	0	0	0	0	0	35.9	30	1.19667	0	68	3.19	5.08	2.65	1.84	3.62	88	180	0	2	160	61	23.8281	0
43	1	37	9	1	0	0	0	1	0	0	1	48.5	29.5	1.64407	0	104	4.24	8.24	5.84	1.49	5.3	153	45.9	0	2	172	90	30.4218	0
44	1	60	10	1	0	0	0	0	0	0	0	38.4	37.9	1.01319	1	145	2.74	6.89	5.2	1.16	3.91	120	194	1	2	172	70	23.6614	0
45	1	59	18	0	0	0	0	1	0	0	1	44.5	27.2	1.63603	0	102	4.65	6.32	3.41	2.05	4.91	156	32.6	0	1	171	76	25.9909	0
46	0	60	16	0	0	0	0	0	0	0	0	34.6	28	1.23571	0	127	3.02	5.23	3.85	0.81	3.55	108	201	0	1	165	55	20.202	1
47	0	64	8	1	0	0	0	0	0	0	0	48.1	29.1	1.65292	0	75	4.05	11.18	8.39	2.19	3.43	111	6318.4	0	2	160	57	22.2656	0
48	0	24	6	1	0	1	0	0	0	0	0	37.8	33.5	1.12836	1	63	3.78	10.31	5.87	3.46	4.24	128	6275.1	1	1	163	47	17.6898	1
49	0	79	9	1	0	1	0	1	0	0	0	37.5	31.5	1.19048	0	247	4.7	5.45	4.45	0.77	2.4	75	25.5	0	3	140	40	20.4082	0
50	1	35	11	1	0	0	0	0	0	0	0	33.4	18	1.85556	0	66	4.51	4.49	2.07	1.33	4.69	137	89.7	0	2	140	40	20.4082	0
51	1	56	10	0	0	0	0	0	0	0	0	40.7	25.9	1.57143	0	94	5.11	5.97	2.97	2.38	4.64	134	71.1	0	2	166	74	26.8544	0
52	1	54	12	0	0	0	0	0	0	0	1	42.2	24.5	1.72245	1	93	4.52	7.25	3.72	2.63	4.65	140	70.2	0	1	175	70	22.8571	0
53	1	48	12	0	0	0	0	0	0	0	0	44.4	28.2	1.57447	0	112	2.79	5.28	3.9	0.96	4.67	143	17.4	0	1	168	70	24.8016	0
54	1	66	11	1	0	0	0	0	0	0	0	36.1	23.4	1.54274	0	112	2.79	5.28	3.9	0.96	4.67	143	17.4	0	2	160	55	21.4844	0
55	0	50	20	1	0	0	0	0	0	0	0	39.9	29.3	1.36177	0	47	2.84	3.69	1.47	1.66	4.13	127	576.7	0	1	160	73.5	28.7109	0
56	0	59	12	1	0	0	0	0	0	0	0	46.7	29.8	1.56711	0	68	6.05	7.63	4.75	2.27	4.35	139	45.6	0	1	147	58	26.8407	0
57	1	59	16	1	0	0	0	1	0	1	0	29.3	18.8	1.55851	0	426	3.82	7.36	5.24	1.21	4.24	126	10	0	2	156	56.5	23.2166	0
58	1	32	10	0	0	0	0	0	0	0	1	37.7	28.8	1.30903	0	81	3.29	6.06	3.54	1.65	4.52	135	44	0	1	178	67	21.1463	0
59	1	47	11	1	0	0	0	0	0	0	0	35.5	28.1	1.26335	0	165	2.86	5.53	3.43	1.36	4.06	117	83.7	0	1	168	70	24.8016	0
60	1	55	9	1	1	0	0	0	0	0	0	39	33.5	1.16418	0	88	3.4	11.34	8.58	1.65	4.9	155	10	0	1	168	68	24.093	1
61	0	40	20	0	0	0	0	0	0	0	0	39.7	32.1	1.23676	0	86	5.02	5.51	2.66	2.31	4.03	130	12.7	0	1	156	68	27.9421	0
62	1	51	12	0	0	0	0	0	0	0	0	40.3	26.7	1.50936	0	84	4.44	6.22	3.05	2.72	4.6	144	93	0	1	168	78	27.6361	0
63	1	59	7	0	0	0	0	1	0	1	0	38.8	25.2	1.53968	0	67	5.22	7.52	4.18	2.5	4.48	140	65	0	2	170	74	25.6055	0
64	1	61	19.1	1	0	0	0	1	0	1	1	31.3	46.7	0.670236	0	88	4.44	9.1	6.78	1.59	3.82	109	37.5	0	1	156	72	29.5858	0
65	1	42	12	1	0	0	0	0	0	0	1	43.2	28.3	1.5265	0	74	3.66	6.08	3.31	2.08	4.89	144	227.8	0	1	171	83	28.3848	0
66	1	55	13	0	0	0	0	0	0	0	0	49.6	25.3	1.96047	0	70	4.36	6.18	3.14	2.19	4.35	141	117.5	0	1	163	50	18.8189	0
67	0	44	7	1	0	0	0	0	0	1	0	41.8	35.3	1.18414	0	49	4.94	8.68	5.83	2.42	4.58	130	40.8	0	1	160	70	27.3438	0
68	0	46	3	0	0	0	0	0	0	0	0	43.3	33.4	1.29641	0	54	3.71	4.88	1.79	2.56	4.15	128	252.5	0	2	154	52	21.9261	1
69	0	52	9	0	0	0	0	0	0	0	1	39.3	22.4	1.75446	0	61	5.78	4.44	2.06	2	4.23	129	33.4	0	2	155	55	22.8928	0
70	1	70	18	0	0	0	1	0	0	0	0	43.6	33.7	1.29377	0	165	4.64	6.56	4.79	1.13	4.88	134	11.9	0	2	170	68	23.5294	0
71	0	61	10	1	0	0	0	0	0	1	0	36.2	28.4	1.27465	0	58	4.17	4.08	1.73	1.72	4.36	129	101.7	0	1	162	62	23.6244	0
72	1	53	22	1	0	0	0	1	0	0	0	41.5	27.2	1.52574	0	96	3.68	4.89	2.98	1.4	4.55	141	80	0	2	172	67	22.6474	0
73	1	51	23	1	0	0	0	0	0	1	0	38.7	27.6	1.40217	0	103	3.78	5.41	3.78	1.35	3.97	128	109.8	0	1	163	69	25.9701	0
74	1	42	9	0	0	0	0	0	0	0	0	44.4	26.9	1.65056	0	85	5.18	6.83	2.86	3.06	4.76	148	186.1	0	1	170	85	29.4118	0
75	0	53	15	0	0	0	0	0	0	0	0	41.5	30.3	1.36964	0	67	4.52	3.13	1.65	1.12	4.36	128	364.2	0	1	157	50	20.2848	0
76	0	32	10	1	0	0	0	0	0	0	1	44.1	34.6	1.27457	0	71	4.54	7.42	5.05	1.67	4.98	138	49.1	0	2	152	50	21.6413	0
77	1	33	7	0	0	0	0	0	0	0	1	41.3	30.6	1.34967	0	189	4.06	10.04	7.02	2.06	4.68	135	35.1	0	2	170	72	24.9135	0
78	0	52	8	0	0	0	0	0	0	0	0	43.9	31.9	1.37618	0	88	4.88	5.41	3.15	1.71	4.21	120	14.9	0	2	166	62	22.4996	0
79	1	47	6	1	0	0	0	0	0	0	1	42.2	24.9	1.69478	0	80	3.03	6.19	3.07	2.42	4.68	142	90	0	1	175	77	25.1429	0
80	0	53	13	0	1	1	0	0	0	0	0	35.3	36.5	0.967123	0	67	5.13	4.24	2.1	1.61	3.89	117	5990.6	0	2	156	60	24.6548	0
81	1	65	19	0	0	0	0	1	0	0	0	39.3	26.6	1.47744	0	132	3.78	5.4	3	1.52	4.3	129	35	0	2	160	70	27.3438	0
82	1	42	10	0	0	0	0	0	0	0	0	42.3	22.3	1.89686	0	77	4.92	8.13	3.89	3.61	4.71	145	105.3	0	1	170	62	21.4533	0
83	1	67	20	0	0	0	0	0	0	0	0	35.3	25	1.412	0	107	2.49	7.05	4.63	1.57	4.21	134	128.2	0	3	172	63	21.2953	0
84	1	43	9	0	0	0	0	0	0	0	0	37.6	30.7	1.22476	0	89	4.41	7.03	4.56	1.56	4.1	126	42	0	2	170	60	20.7612	0
85	1	42	16	1	0	0	0	1	0	0	0	43.7	28.6	1.52797	0	103	3.69	9.54	5.22	3.6	5.45	156	8.2	0	1	165	74	27.1809	0
86	0	29	16	1	0	0	0	0	1	0	0	44.6	31.3	1.42492	0	99	6.3	14.57	12.12	1.12	4.7	139	4.9	0	2	159	44	17.4044	0
87	1	56	13	0	0	0	0	0	0	0	0	43.2	22.6	1.9115	0	94	5.14	7.76	3.78	2.82	4.87	147	258	0	2	180	77	23.7654	0
88	1	42	14	1	0	0	0	1	0	0	0	41.9	28.2	1.48582	0	85	3.15	7.56	4.54	2.25	4.85	137	1	0	2	170	80	27.6817	0
89	1	34	10	0	0	0	0	0	0	0	0	39.2	27	1.45185	0	106	3.47	3.18	1.39	1.43	4.06	124	9.3	0	1	170	57	19.7232	0
90	0	54	8	0	0	0	1	0	0	0	0	42.1	35	1.20286	1	71	5.24	5.92	3.97	1.47	3.62	112	3553.1	1	2	154	40	16.8663	0
91	0	74	14	0	0	0	0	1	0	1	0	36.7	26	1.41154	1	94	4.06	5.86	3.81	1.58	5.29	109	401.4	1	1	162	62	23.6244	0
92	1	39	20	0	0	0	0	0	0	0	0	35.4	32.2	1.09938	0	157	4.41	9.56	5.71	2.65	4.68	136	225.3	0	1	178	67	21.1463	0
93	1	66	11	1	0	0	0	1	0	0	1	39.4	29	1.35862	0	93	4.11	6.84	3.85	2.28	4.73	129	84.7	0	1	173	70	23.3887	0
94	1	29	10	1	0	0	0	0	0	0	0	48	27.1	1.77122	0	99	4.22	7.35	4.1	2.49	4.93	153	69	0	2	165	80	29.3848	0
95	0	84	6	1	0	0	0	0	0	0	0	38.3	25.9	1.47876	0	143	5.05	3.25	2.15	0.79	3.07	100	60.3	0	3	157	68	27.5873	0
96	0	34	10	0	1	1	0	0	0	0	0	33.7	34.6	0.973988	0	68	3.45	10.98	9.04	1.14	3.39	95	41.7	0	1	152	55	23.8054	0
97	0	59	4	0	0	1	0	0	0	0	0	35.4	30.7	1.15309	0	451	5.21	10.6	9.13	0.84	3.79	113	122.5	0	1	156	53	21.7784	0
98	0	60	20	0	0	0	0	0	0	0	0	32.7	42.7	0.765808	0	277	4.18	11.51	8.45	2.05	4.03	116	4171.9	0	1	154	56	23.6128	0
99	0	70	14	1	0	0	0	1	0	0	0	42.1	30.9	1.36246	0	76	6.62	7.21	4.13	2.42	4.39	134	86.7	0	1	160	52	20.3125	0
100	1	36	9	0	0	0	0	0	0	0	0	36.5	36.8	0.991848	0	116	4.17	11.05	7.02	2.81	4.22	137	103.8	0	2	164	75	27.8852	0
101	1	68	15	0	0	0	0	0	0	0	0	35.9	30.7	1.16938	0	80	3.61	4.13	1.88	1.48	3.77	123	42.3	0	3	168	64	22.6757	0
102	1	50	9	1	1	0	0	1	0	0	0	34.7	34.2	1.01462	0	180	4.12	7.65	5.64	0.93	3.68	117	4.6	0	2	162	66	25.1486	0
103	1	29	9	1	0	0	0	0	0	0	0	43.3	29.2	1.48288	0	107	3.69	7.39	4.32	2.14	5.04	149	38	0	1	178	83	26.1962	0
104	1	37	20	0	0	0	0	0	0	0	0	45.6	23.9	1.90795	0	100	4.91	7.42	3.3	3.5	4.88	160	93	0	1	170	70	24.2215	0
105	1	78	21	0	0	0	0	1	0	1	0	39.9	27.7	1.44043	0	111	5.04	6.34	3.84	1.59	4.58	131	60.7	0	2	152	59	25.5367	0
106	1	35	14	0	0	0	0	0	0	0	0	43.4	25.9	1.67568	0	137	5.13	3.7	1.92	1.32	4.84	146	47	0	2	178	73	23.04	0
107	1	38	10	1	0	0	0	0	0	0	0	42.4	29.3	1.4471	0	101	3.46	7.29	4.51	1.77	6.14	131	42	0	1	168	66	23.3844	0
108	0	65	8	0	0	0	0	1	0	0	0	41.1	24	1.7125	0	55	5.47	4.27	2.29	1.59	4.24	120	249.9	0	3	154	43	18.1312	0
109	0	65	10	0	0	0	1	1	0	0	0	40.8	30.3	1.34653	1	81	3.14	5.14	3.31	1.11	3.5	101	52	1	3	157	64	25.9645	0
110	1	43	14	1	1	0	0	0	0	0	0	38.8	25.9	1.49807	1	97	2.23	6.04	3.82	1.48	3.98	123	913.1	0	2	162	52	19.8141	1
111	0	66	10	1	0	0	0	0	0	0	0	40.7	25.7	1.58366	0	592	3.64	3.29	2.23	0.77	3.7	104	963.1	0	1	160	46	17.9688	0
112	1	64	23	1	0	0	1	1	0	0	0	39.7	28.1	1.41281	0	39.7	2.81	7.98	4.69	2.21	4	130	49	0	1	165	66	24.2424	0
113	0	53	9	0	0	0	0	1	0	0	0	41.7	26.9	1.55019	1	80	4.14	5.36	3.27	1.52	4.04	123	826.8	1	1	154	52	21.9261	0
114	1	65	12	0	1	0	0	1	0	0	1	39.5	29.2	1.35274	0	563	2.9	10.42	8.35	1.44	3.32	90	2921.2	0	1	168	63	22.3214	0
115	1	49	18	1	0	0	0	0	0	0	1	39.7	30.1	1.31894	0	56	5.52	5.28	3.41	1.39	4.72	143	10.3	0	2	168	70	24.8016	0
116	1	45	15	1	1	0	0	0	0	0	0	34.5	41.9	0.823389	0	180	3.49	8.4	6.12	1.41	4.01	119	1823.9	0	2	175	64	20.898	0
117	0	90	4	0	1	0	0	0	0	0	0	34.5	33.5	1.02985	0	83	4.01	7.59	5.13	1.24	3.64	111	8.6	0	3	154	36	15.1796	0
118	0	52	16	0	0	0	0	0	0	0	0	43.2	27.1	1.5941	0	58	4.83	6.07	3.38	2.07	4.39	126	68.8	0	2	166	68	24.677	0
119	1	61	10	1	0	0	0	0	0	0	0	36.1	26.5	1.36226	0	86	4.03	7.38	4.14	2.43	4.78	150	29.6	0	2	165	57	20.9366	0
120	1	51	21	1	0	0	0	1	0	0	0	41.2	26.9	1.5316	0	119	5.01	5.09	2.26	2.33	4.07	124	10	0	1	170	70	24.2215	0
121	1	54	11	0	0	0	0	0	0	0	0	40.6	31	1.30968	0	110	3.61	6.26	3.41	2.04	4.72	151	14.5	0	1	155	62	25.8065	0
122	1	47	15	0	0	0	0	0	0	0	0	38.8	29.1	1.33333	0	106	4.74	8.26	4.54	2.56	4.7	144	98	0	1	168	70	24.8016	0
123	0	34	16	0	0	0	0	0	0	0	1	41.8	28	1.49286	1	73	4.02	6.83	4.16	2.03	4.29	128	236	0	1	150	45	20	0
124	0	44	11	0	0	0	0	0	0	0	0	38.9	27.7	1.40433	1	55	4.02	3.75	1.65	1.68	3.99	122	316	1	1	157	45.5	18.4592	1
125	0	49	19	0	0	0	0	0	0	1	0	37.2	26.6	1.3985	0	38	2.46	6.72	3.73	2.4	3.84	128	54	0	2	163	62	23.3355	0
126	1	52	14	0	0	0	0	0	0	1	0	43.8	24.6	1.78049	0	103	4.05	7.54	3.77	3.01	4.55	138	141.6	0	2	165	67	24.6097	0
127	1	43	8	0	0	0	0	0	0	0	0	43.2	25.4	1.70079	0	82	5.81	5.74	3.09	2.12	4.86	137	51.6	0	2	170	70	24.2215	0
128	0	68	6	0	0	0	0	0	0	0	0	40.5	27.4	1.4781	0	57	4.64	5.56	3.31	1.64	4.12	123	179.5	0	2	147	45	20.8247	0
129	1	55	15	1	0	0	0	1	0	0	0	38.6	28.3	1.36396	0	140	4.62	10.82	8.1	1.6	4.43	139	54.9	0	2	176	78	25.1808	0
130	1	44	8	1	0	0	0	0	0	0	0	39.6	27.3	1.45055	0	94	3.92	4.66	1.98	2.05	5.21	152	4.6	0	1	176	105	33.8972	0
131	1	43	18	0	0	0	0	0	0	0	0	34.6	21.8	1.58716	0	114	3.34	9.46	4.72	3.8	4.62	148	142.6	0	2	170	75	25.9516	0
132	0	55	11	0	0	1	0	0	0	0	0	40	27.7	1.44404	1	55	4.68	3.62	1.83	1.51	4.22	123	577.9	1	2	155	52.5	21.8522	0
133	0	60	10	1	1	0	0	0	0	0	0	36.5	24.2	1.50826	0	147	5.31	6.58	3.49	2.09	4.49	120	295.9	0	1	157	52	21.0962	0
134	1	41	19	0	0	0	0	0	0	0	0	33.5	22.4	1.49554	0	85	4.5	5.48	2.66	2	5.16	166	5	0	1	171	80	27.3588	0
135	1	70	10	0	0	0	0	1	0	0	0	41.1	29.3	1.40273	0	145	4.04	6.87	4.79	1.31	4.33	128	1.3	0	2	167	72	25.8166	0
136	1	77	10	0	0	0	0	1	0	0	0	37.4	33.9	1.10324	0	164	3.99	6.44	4.52	1.32	4.88	146	1.3	0	2	175	76	24.8163	0
137	0	74	23	0	0	0	0	1	0	1	0	35.4	35.3	1.00283	1	74	3.03	6.36	3.24	2.16	3.73	105	648.5	0	1	160	56	21.875	0
138	1	47	15	0	0	0	0	0	0	0	0	43.2	31.3	1.38019	0	92	5.25	5.58	3.64	1.23	4.52	155	130.4	0	2	170	65	22.4913	0
139	1	31	13	0	0	0	0	0	0	0	0	43.2	28.1	1.53737	0	76	4.14	10.39	6.55	2.74	4.65	139	245.8	0	2	170	60	20.7612	0
140	1	26	7	1	0	0	0	0	0	0	0	40.9	27.8	1.47122	0	126	5.46	6.68	3.39	2.61	4.85	140	25.2	0	2	170	90	31.1419	0
141	1	55	11	0	0	0	0	0	0	0	0	41.7	19.8	2.10606	0	113	3.79	8.33	5.36	1.87	4.68	145	14	0	2	165	65	23.8751	0
142	0	55	14	0	0	0	0	1	0	0	0	39.6	34.6	1.14451	1	170	5.16	8.68	5.94	1.67	3.47	100	1621.3	0	2	158	68	27.2392	0
143	0	46	10	1	1	0	0	0	0	0	0	34.4	28.8	1.19444	0	70	2.9	12.19	11.3	0.52	3.17	95	157.9	0	2	160	75	29.2969	0
144	1	52	21	1	0	0	0	1	0	1	1	44.9	27.5	1.63273	0	109	4.69	5.97	3.04	2.23	4.61	152	85	0	2	161	65	25.0762	0
145	0	47	8	1	1	0	0	0	0	0	0	36.4	28	1.3	1	54	4.87	7.9	5.89	1.21	3.65	111	234.6	1	1	160	55	21.4844	1
146	0	54	8	0	0	0	1	1	0	0	0	40.1	22.2	1.80631	1	98	4.87	2.68	1.65	0.77	3.79	115	1226.2	1	2	163	63	23.7118	0
147	1	68	6	0	0	0	0	1	0	0	0	44.3	35.8	1.23743	0	199	4.5	5.59	3.31	1.56	4.22	135	4	0	2	168	70	24.8016	0
148	0	49	7	0	0	0	0	0	0	0	0	40.6	29.6	1.37162	0	70	3.83	5.99	3.2	2.06	4.17	111	36.6	0	1	167	80	28.6851	0
149	1	33	8	1	0	0	0	0	0	0	1	45.4	28.4	1.59859	0	81	3.55	6.14	3.98	1.42	5.22	144	98.1	0	1	168	62	21.9671	0
150	1	38	7	0	0	0	0	0	0	0	0	43.2	24.7	1.74899	0	77	3.79	7.81	4.15	3.08	4.92	146	89.6	0	1	178	82	25.8806	0
151	0	36	4	0	1	0	0	0	0	0	0	36.8	33.3	1.10511	0	74	3.73	7.15	4.73	1.82	3.67	105	35.6	0	2	155	55	22.8928	1
152	0	47	9	1	0	0	0	0	0	0	1	42	21.6	1.94444	0	73	4.11	5.27	2.28	2.37	3.89	122	16	0	1	152	52	22.5069	0
153	1	51	16	0	0	0	0	0	0	0	0	39.3	24.1	1.63071	0	52	3.88	5.76	3.24	1.65	4.16	134	193.5	0	1	168	65	23.03	0
154	1	56	7	1	0	0	0	1	0	1	1	39.6	34.1	1.16129	0	96	4.18	6.08	3.38	1.92	5.53	158	20000	0	2	172	72	24.3375	0
155	1	21	14	1	0	0	0	0	0	0	0	44.1	26.6	1.65789	0	82	2.98	6.09	2.32	2.87	5.35	163	201.2	0	2	165	58	21.3039	0
156	1	30	12	1	0	0	0	0	0	0	0	48.9	22.8	2.14474	0	73	4.09	9.1	4.19	3.72	5.15	154	10.5	0	1	172	71	23.9995	0
157	0	61	20	0	0	1	0	0	0	0	1	37	25.3	1.46245	1	65	4.2	3.99	2.01	1.59	3.82	118	453.9	0	1	158	51	20.4294	0
158	0	54	15	1	0	0	0	0	0	0	0	39.3	30.2	1.30132	0	57	4.32	5.37	2.71	2.02	4.03	120	330	0	2	156	55	22.6003	0
159	0	67	6	1	0	0	0	0	0	0	0	38.8	27.2	1.42647	0	53	4.21	7.03	4.12	2.42	4.02	115	7	0	2	160	60	23.4375	0
160	0	55	7	0	0	0	0	0	0	0	0	43.7	28.8	1.51736	0	79	4.83	8.13	4.91	2.47	4.52	138	15.5	0	2	165	77	28.2828	0
161	1	64	5	0	0	0	0	0	0	1	0	40	30.3	1.32013	0	65	3.93	8.01	4.63	2.78	4.84	154	57.8	0	1	168	72	25.5102	0
162	1	52	10	0	0	1	0	0	0	0	0	43.3	37.8	1.1455	0	85	4.8	5.21	3.61	1.26	4.02	127	19.8	0	2	160	60	23.4375	0
163	0	51	14	0	1	0	0	0	0	0	0	40	42.8	0.934579	0	125	4.3	10.55	8.67	1.13	4.39	125	1072.7	0	2	158	60	24.0346	0
164	1	64	21	1	0	0	0	0	0	1	0	44.5	26.8	1.66045	0	103	4.99	5.69	3.49	1.42	4.89	149	16.4	0	2	171	85	29.0688	0
165	1	53	17	1	0	0	0	1	0	1	0	46	32.1	1.43302	0	279	4.66	7.52	5.43	1.38	4.59	139	45	0	2	173	60	20.0474	0
166	0	50	28	1	0	0	0	1	0	0	1	40	35	1.14286	0	200	3.4	6.75	5.9	0.61	2.28	72.8	13.6	0	2	164	60	22.3081	0
167	1	60	13	0	0	0	0	1	0	0	0	37.9	25.4	1.49213	0	78	5.02	5.17	2.83	1.92	4.09	134	45	0	2	170	70	24.2215	0
168	1	34	10	1	0	0	0	0	0	0	0	43.1	28.1	1.53381	0	43.1	2.81	7.75	3.91	2.75	4.65	151	74.3	0	1	174	81	26.7539	0
169	1	64	15	0	0	0	0	0	0	0	0	41.3	26.9	1.53532	0	82	3.76	4.5	3.14	0.88	4.3	125	11	0	1	170	60	20.7612	0
170	0	62	11	0	0	0	0	1	0	0	0	42.6	28.8	1.47917	0	96	5.41	5.17	2.55	1.86	4.54	129	45	0	2	160	61	23.8281	0
171	1	51	18	1	0	0	0	0	0	0	1	38.3	24	1.59583	0	93	5.27	4.81	2.88	1.56	4.93	150	8.2	0	2	165	73	26.8136	0
172	1	54	7	0	0	0	0	0	0	0	0	38.7	30	1.29	0	86	3.6	7.26	5.42	1.28	4.49	149	23	0	2	170	79	27.3356	0
173	0	54	12	0	0	0	0	0	0	0	0	37.9	29.7	1.27609	1	104	3.8	4.66	2.81	1.34	3.53	107	527	0	1	156	60	24.6548	0
174	1	31	11	0	0	0	0	0	0	0	0	40.8	22.7	1.79736	0	94	4.34	6.38	2.77	3.05	4.49	135	97	0	2	170	62	21.4533	0
175	1	37	4	1	0	0	0	0	0	1	1	45.6	26.4	1.72727	0	71	5.44	4.96	1.97	2.34	5.23	160	69.3	0	2	176	72	23.2438	0
176	0	28	14	0	0	0	0	0	0	0	0	34.4	38.9	0.884319	0	673	3.27	11.11	9.04	1.22	2.49	79	85	0	2	160	68	26.5625	0
177	1	52	8	0	0	0	0	0	0	0	0	38.7	26.4	1.46591	0	178	3.81	6.11	3.7	1.68	4.96	141	133.4	0	2	170	73	25.2595	0
178	1	35	14	0	0	0	0	0	0	0	0	40.3	23.2	1.73707	0	125	3.85	4.23	1.72	2.15	4.18	129	125.9	0	1	170	59	20.4152	0
179	1	54	23	1	0	1	0	0	0	1	0	37.1	31.5	1.17778	0	102	6.59	10.42	8.13	0.96	5.23	144	2780.4	0	2	178	93	29.3524	0
180	1	49	12	1	0	0	0	0	0	0	0	43.9	34	1.29118	0	115	3.69	6.18	3.45	1.88	4.88	147	12	0	2	174	72.5	23.9464	0
181	0	71	8.7	0	0	1	1	1	0	1	0	38.9	37.7	1.03183	1	157	4.93	8.19	3.47	3.71	3.45	105	24.9	1	2	160	63	24.6094	0
182	0	27	6	0	0	0	0	0	0	0	0	37.6	39.4	0.954315	0	79	4.22	12.43	9.78	1.43	4.64	137	45.5	0	2	156	64	26.2985	1
183	1	32	12	0	0	0	0	0	0	0	0	40.5	23.9	1.69456	0	97	4.66	5.73	2.59	2.46	4.74	148	34.8	0	2	172	77	26.0276	0
184	0	83	14	1	0	0	0	1	0	1	0	37.3	24.4	1.52869	0	80	4.26	4.4	2.4	1.37	3.91	125	208.8	0	2	158	62	24.8358	0
185	0	54	14	1	0	0	0	0	0	0	0	39.7	22	1.80455	0	77	4.77	5.63	2.57	2.37	5.11	112	105	0	2	159	52	20.5688	0
186	0	41	18	1	0	0	0	0	0	0	0	39.9	27.9	1.43011	0	69	3.11	6.2	3.52	1.89	4.19	118	141	0	1	150	46	20.4444	0
187	0	61	12	1	0	0	0	1	0	0	1	44.3	36.4	1.21703	0	110	5.48	4.28	2.59	1.27	4.18	122	11.6	0	2	160	66	25.7812	0
188	0	47	11	1	0	0	0	0	0	0	0	36.8	27.5	1.33818	1	55	3.6	5.39	2.51	2.16	3.77	118	721.4	0	1	154	56	23.6128	1
189	1	65	12	1	0	0	0	0	0	0	0	30.3	27.5	1.10182	0	107	2.82	8.76	6.62	1.18	4.18	139	3831.6	0	2	168	60	21.2585	0
190	1	54	10	1	1	0	0	1	0	1	0	41.1	38	1.08158	0	179	3.65	12.85	7.57	3.34	5.51	161	5.4	0	1	170	80	27.6817	0
191	1	53	20	1	0	0	0	0	0	0	0	43.1	24.2	1.78099	0	76	5.35	5.91	3.06	2.21	4.28	137	11	0	1	163	55	20.7008	0
192	0	71	16	1	0	0	0	0	0	0	0	39.3	33.5	1.17313	0	61	4.24	4.64	2.33	1.83	4.68	105	44	0	2	150	51	22.6667	0
193	1	33	15	0	0	0	0	0	0	0	0	36.6	26.9	1.36059	0	67	3.58	6.48	3.57	1.86	4.83	143	1	0	1	158	56	22.4323	0
194	1	46	13	1	0	0	0	0	0	0	0	38	38.1	0.997375	0	142	4.7	9.57	7.2	1.54	3.92	123	167	0	1	170	70	24.2215	0
195	1	28	12	1	0	0	0	0	0	0	1	40.5	29.7	1.36364	0	150	3.72	7.45	3.54	2.96	4.07	122	11	0	2	170	82	28.3737	0
196	1	48	26	0	0	0	0	1	0	1	0	46.2	27	1.71111	0	75	5.03	7.13	4.15	2.01	5.16	154	123.4	0	2	167	70	25.0995	0
197	1	66	7	1	0	0	0	0	0	0	1	37.2	23.1	1.61039	0	100	4.98	4.15	2.15	1.28	3.45	108	12	0	1	163	58	21.83	0
198	0	60	8	0	0	1	0	1	0	1	0	36.3	32.3	1.12384	0	76	4.15	7.59	3.66	3.13	3.84	115	36.7	0	2	157	52	21.0962	0
199	0	62	8	1	0	0	0	0	0	0	0	45.1	31.8	1.41824	1	64	6.02	10.81	7.63	2.34	4.42	130	110.5	1	2	157	49	19.8791	0
200	1	60	10	0	0	0	0	1	0	0	0	36.7	25.7	1.42802	0	89	4.1	5.68	3.15	1.64	4.71	146	189.3	0	2	171	78	26.6749	0
201	1	24	7	0	0	0	0	0	0	0	0	43.4	25.5	1.70196	0	160	2.68	13.05	9.66	1.69	4.79	137	54.2	0	2	165	55	20.202	0
202	0	58	8	0	0	0	0	0	0	0	0	32.8	40.9	0.801956	0	46	2.95	6.02	2	2.93	3.42	96	107.1	0	1	160	48	18.75	1
203	0	47	13	1	0	0	0	0	0	0	0	41.5	25.7	1.61479	0	74	4.04	3.94	1.57	1.85	3.89	118	366.6	0	1	153	50	21.3593	0
204	1	55	7	0	0	0	0	1	0	0	0	41.5	28.6	1.45105	0	134	4.49	7.09	4.77	1.75	4.87	143	10	0	2	186	81	23.4131	0
205	1	47	11	1	1	1	0	0	0	0	0	28.9	43.1	0.670534	1	141	3.23	12.34	9.83	1.8	4.14	123	51.5	1	1	152	56	24.2382	1
206	1	62	10	1	1	0	0	0	0	0	0	30.5	31.5	0.968254	0	87	2.97	6.03	4.83	0.94	4.36	84	96.1	0	2	168	56	19.8413	0
207	1	65	8	1	0	0	0	1	0	0	0	33.6	24.6	1.36585	0	1057	3.06	5.8	2.86	0.71	2.13	65	20000	0	2	170	58	20.0692	0
208	0	55	15	1	0	0	0	0	0	0	0	40	30.2	1.3245	0	77	4.53	3.23	1.61	1.22	3.96	122	1478.7	0	1	150	64	28.4444	0
209	1	48	13	1	0	0	0	0	0	0	0	44.2	35	1.26286	0	84	4.48	6.62	3.98	2.05	5.51	154	69.3	0	2	168	72	25.5102	0
210	1	48	19	0	0	0	0	0	0	0	0	36.3	25.9	1.40154	0	120	5.2	5.45	2.27	2.36	4.5	133	37	0	1	183	78	23.2912	0
211	0	40	11	1	0	0	0	0	0	0	0	39.1	25.9	1.50965	0	69	3.13	3.46	1.78	1.42	3.95	116	35	0	1	156	47	19.313	0
212	0	66	15	1	0	0	0	0	0	0	0	38.3	31.1	1.23151	1	72	4.63	5.99	3.01	2.33	4.38	133	20000	1	1	160	79	30.8594	0
213	1	52	7	1	0	0	0	0	0	0	0	37.2	29.9	1.24415	0	164	4.08	6.2	3.96	1.56	5.99	170	58.5	0	1	176	88	28.4091	0
214	1	46	17	0	0	0	0	0	0	0	0	35.9	25	1.436	0	114	3.64	7.53	4.4	2.34	4.6	140	52.9	0	2	158	49	19.6283	0
215	1	48	18	0	0	0	0	0	0	1	0	40.3	32.1	1.25545	0	158	3.29	8.01	4.93	2.23	3.85	125	35.5	0	2	162	67	25.5296	0
216	0	49	12	0	0	0	0	0	0	0	0	39.4	29.6	1.33108	0	89	4.8	6.38	3.13	2.59	3.84	116	11	0	1	153	54	23.0681	0
217	0	67	10	1	0	0	0	0	0	1	0	44.4	34.5	1.28696	1	106	5.68	4.28	2.5	1.35	4.12	131	580.3	1	1	156	65	26.7094	0
218	1	40	15	0	0	0	0	0	0	0	0	42.6	31.6	1.3481	0	1244	6.05	10.88	9.3	0.96	3.31	94	5.7	0	2	177	75	23.9395	0
219	0	61	9	0	0	0	0	0	0	0	0	42.5	26.5	1.60377	0	75	4.58	4.52	2.86	1.32	5.52	112	171.1	0	2	166	66	23.9512	0
220	1	49	18	1	0	0	0	0	0	0	0	42.2	27.7	1.52347	0	84	2.4	5.04	2.44	2.22	4.36	130	27	0	1	175	70	22.8571	0
221	0	66	10	0	0	0	0	0	0	0	0	39.5	28.2	1.40071	0	69	5.66	4.93	2.94	1.56	4.45	127	46.4	0	2	156	60	24.6548	0
222	1	49	7	0	0	0	0	0	0	0	0	40.8	23.2	1.75862	0	82	3.41	4.03	2.06	1.58	3.87	124	192.4	0	2	175	58	18.9388	0
223	1	35	10	1	0	0	0	0	0	0	0	41	27.5	1.49091	0	69	3.62	5.82	3.33	1.81	4.84	155	36.2	0	2	180	70	21.6049	0
224	0	51	8	0	0	1	0	1	0	0	0	34.8	35.2	0.988636	0	363	4.96	8.6	7.43	0.84	3.8	111	39	0	1	158	52	20.83	0
225	1	60	14	0	0	0	0	1	0	0	0	37.8	37.7	1.00265	0	75	3.36	7.89	5.02	2.06	5.3	153	120.3	0	2	182	58	17.51	0
226	0	39	9	1	0	0	0	0	0	0	0	36.8	26.5	1.38868	0	111	3.09	5.52	3.13	1.44	3.89	114	3.6	0	1	164	60	22.3081	0
227	1	65	20	0	0	0	0	1	0	0	0	38	27.7	1.37184	0	123	6.01	5.94	3.4	1.86	4.79	138	8.7	0	1	172	73	24.6755	0
228	1	43	6	1	0	0	0	0	0	0	0	47.7	28.9	1.65052	0	82	3.58	4.33	2.84	1.15	4.91	146	58.9	0	2	170	73	25.2595	0
229	1	81	22	0	0	0	0	0	0	0	0	38.9	28.7	1.3554	0	107	4.22	4.74	2.79	1.33	4.05	124	13	0	2	159	62	24.5243	0
230	1	60	21	0	0	0	0	0	0	0	1	38.7	29.2	1.32534	0	81	4.27	8.11	5.19	1.73	4.92	165	203.6	0	2	160	55	21.4844	0
231	1	41	21	1	0	0	0	0	0	0	1	39.9	24	1.6625	0	73	4.24	5.75	2.97	2.14	4.52	141	100.9	0	2	168	59	20.9042	0
232	1	53	10	0	0	1	0	0	0	0	0	27	25.9	1.04247	0	122	3.45	34.15	30.76	1.68	3.68	108	10.5	0	3	158	62	24.8358	0
233	1	31	9	1	0	0	0	0	0	0	0	47.5	29.9	1.58863	0	103	4.35	8	3.67	3.51	5.26	155	113.4	0	1	175	75	24.4898	0
234	1	20	5	0	0	0	0	0	0	0	0	45.6	27.5	1.65818	0	137	4.82	8.61	4.45	3.08	5.13	150	2.1	0	2	172	90	30.4218	0
235	1	58	23	1	0	0	0	0	0	0	0	43	31.4	1.36943	0	139	4.27	6.12	3.53	1.92	4.13	134	27.9	0	1	169	61	21.3578	0
236	1	69	10	1	0	0	0	0	0	0	0	37.7	19.4	1.9433	0	300	2.66	5.01	3.62	0.44	3.21	96	95.3	0	3	159	54	21.3599	0
237	1	68	10	0	0	0	0	1	0	0	0	41.2	24.1	1.70954	0	112	4.69	4.65	2.88	1.17	5.05	152	66.9	0	2	176	81	26.1493	0
238	0	57	9	0	0	0	0	1	0	1	0	42	25.9	1.62162	0	57	4.38	5.31	2.2	2.7	4.4	127	69	0	2	155	51	21.2279	0
239	1	40	8	0	0	0	0	0	0	0	0	41.9	29.6	1.41554	0	104	2.96	5.57	2.93	1.99	4.59	139	77.6	0	1	177	84	26.8122	0
240	1	46	7	0	0	0	0	0	0	0	0	42.7	29.6	1.44257	0	129	5.02	8.31	6.05	1.67	4.96	136	110.2	0	2	168	70	24.8016	0
241	0	62	4	0	0	0	0	1	0	1	0	43	29.9	1.43813	0	60	5.33	6.36	4.31	1.53	4.79	141	36	0	3	158	70	28.0404	0
242	1	27	15	0	0	0	0	0	0	0	0	45.1	24	1.87917	0	81	4.18	7.88	3.54	3.66	4.91	143	24.4	0	1	169	57	19.9573	0
243	0	37	7	0	0	0	0	0	0	0	0	37.3	26.1	1.42912	0	58	3.24	4.96	2.08	2.31	3.92	126	12.2	0	2	162	63.5	24.196	0
244	1	51	28	0	0	0	0	1	0	0	0	48.2	27.8	1.73381	0	82	2.94	6.48	3.7	1.87	4.52	151	10	0	1	169	80	28.0102	0
245	1	46	15	1	0	0	0	1	0	0	1	40.6	25.4	1.59843	0	96	4.48	5.93	3.67	1.87	4.39	139	17.6	0	1	170	55	19.0311	0
246	0	43	12	0	0	0	0	1	0	0	0	39	37.4	1.04278	1	48	3.42	6.22	3.72	2.07	4.24	105	574.8	1	2	158	70	28.0404	0
247	1	48	10	0	0	0	0	0	0	0	0	46.5	25.6	1.81641	0	105	5.83	6.14	3	2.33	4.42	140	180	0	2	168	70	24.8016	0
248	1	64	15	0	0	1	0	1	0	0	0	28.5	31.7	0.899054	0	166	2.73	11.76	8.75	1.13	3.61	110	36.5	0	2	164	70	26.0262	0
249	0	62	6	1	0	0	0	1	0	0	0	40.7	31.8	1.27987	0	78	7.22	5.76	3.14	2.09	4.07	121	39.5	0	2	163	60	22.5827	0
250	1	81	8	0	0	0	0	0	0	0	0	37.1	24.5	1.51429	0	96	3.27	1.3	0.41	0.72	2.97	85	45	0	2	165	67	24.6097	0
251	0	52	9	0	0	0	0	0	0	0	0	41.9	23.8	1.7605	0	76	3.56	2.8	1.35	1.13	3.61	109	6.2	0	2	163	63	23.7118	0
252	0	44	9	1	1	0	0	0	0	0	0	38.4	31.8	1.20755	1	56	4.5	6.46	3.99	1.96	3.7	115	520.7	1	1	160	50	19.5312	0
253	0	63	20	0	0	0	0	1	0	0	0	42.3	33.8	1.25148	0	82	5.77	4.47	2.44	1.66	4.62	143	51.7	0	3	156	60	24.6548	0
254	0	47	10	0	0	0	0	1	0	0	1	39.4	32.3	1.21981	0	97	4.97	4.55	2.55	1.51	4.23	133	13.1	0	2	160	63	24.6094	0
255	0	53	7	1	0	0	0	1	0	0	0	39.8	33.4	1.19162	0	47	4.77	5.88	4.4	0.82	4.69	131	85	0	2	152	55	23.8054	0
256	0	49	8	1	0	0	0	0	0	0	0	39.2	35.1	1.11681	1	95	4.43	5.85	2.37	2.92	4.06	113	1094.6	0	1	156	59	24.2439	1
257	1	46	16	0	0	0	0	0	0	0	0	41.8	27.7	1.50903	0	74	3.33	4.49	2.64	1.41	5.1	150	94	0	2	175	89	29.0612	0
258	1	53	7.8	1	0	0	0	0	0	0	0	43.8	28.3	1.5477	0	79	3.81	4.5	2.02	1.86	4.62	141	84.7	0	2	172	69	23.3234	0
259	0	27	11	0	0	0	0	0	0	0	0	41.1	21.5	1.91163	0	53	3.73	5.5	2.89	2.21	3.81	121	33.6	0	2	158	46	18.4265	0
260	1	65	7	0	0	0	0	0	0	0	0	41.9	26.8	1.56343	0	130	3.02	3.7	1.89	1.29	4.02	120	13.3	0	2	163	57	21.4536	0
261	1	62	8	1	0	0	0	1	0	1	0	41.3	38.1	1.08399	0	118	5.36	5.68	3.55	1.63	4.81	138	56	0	2	177	92	29.3658	0
262	1	50	15	0	0	0	0	0	0	0	0	44.1	28.2	1.56383	0	132	4.85	6.65	4.44	1.41	4.6	142	3.6	0	2	163	75	28.2284	0
263	1	60	13	1	0	0	0	1	0	0	1	38.8	28.3	1.37102	0	346	5.09	3.86	2.59	0.7	4.24	119	186.1	0	1	160	60	23.4375	0
264	1	54	24	0	1	0	0	1	0	0	0	33.9	33.6	1.00893	0	196	3.89	12.21	9.7	1.67	4.28	143	271.2	1	2	167	58	20.7967	0
265	1	63	13	1	0	0	0	1	0	1	0	41.4	24.5	1.6898	0	81	3.38	4.3	2.38	1.3	4.05	126	11	0	2	163	54	20.3244	0
266	1	71	8	0	0	0	0	0	0	0	0	33.5	29.6	1.13176	0	192	3.31	3.12	1.9	0.71	3.2	98	56.2	0	2	168	42	14.881	0
267	1	61	7.3	1	1	1	0	0	0	1	0	34.8	33.5	1.03881	0	66	3.43	3.34	1.43	1.61	3.7	115	20.8	0	2	173	60	20.0474	0
268	1	55	11	1	0	0	1	1	0	1	0	43	25.8	1.66667	0	187	4.04	6.96	4.34	2.02	4.52	132	7.4	0	4	173	69	23.0546	0
269	1	52	31	1	0	0	0	0	0	0	0	37.1	35.1	1.05698	0	312	4.54	7.51	5.25	1.71	3.42	104	45	0	2	164	75	27.8852	0
270	0	60	10	1	0	0	0	0	0	1	0	40.2	29.4	1.36735	0	67	4.85	6.71	4.16	1.84	4.51	129	54.2	0	1	162	60	22.8624	0
271	1	38	14	0	0	0	0	0	0	0	0	44.9	30.8	1.45779	0	87	4.26	5.71	2.89	2.11	4.81	152	204.8	0	1	174	67	22.1297	0
272	1	28	7	1	0	0	0	0	0	0	0	37.4	26.9	1.39033	0	111	5.04	7.54	3.87	2.83	5.51	162	6.8	0	1	169	71	24.8591	0
273	0	53	10	0	0	0	0	1	0	0	1	41.5	29.3	1.41638	0	89	4.73	7.06	4.06	2.42	4.36	122	16.8	0	2	160	66	25.7812	0
274	1	42	7	0	0	0	0	0	0	0	0	42.9	21.8	1.96789	0	94	3.22	3.82	2.17	1.24	5.47	168	2.2	0	1	165	68	24.977	0
275	1	44	10	1	0	0	0	0	0	0	0	40.8	27.3	1.49451	0	114	3.2	7.19	3.97	2.37	4.4	128	345.4	0	2	169	70	24.5089	0
276	1	39	9	1	0	0	0	0	0	0	1	45.4	29.2	1.55479	0	138	3.81	8.68	4.87	2.87	5.17	156	3.7	0	1	165	63	23.1405	0
277	1	37	16	0	0	0	0	0	0	0	0	39.7	20.1	1.97512	0	80	3.07	6.51	3.05	2.52	4.79	142	11	0	1	178	85	26.8274	0
278	0	51	12	0	0	0	0	0	0	0	0	38.8	24	1.61667	0	69	4.46	4.66	2.8	1.39	4.46	123	21.1	0	1	155	52	21.6441	0
279	1	37	12	0	0	0	0	0	0	0	0	41.8	23.4	1.78632	0	95	4.76	8.09	4.77	1.9	4.91	156	306.4	0	1	172	68	22.9854	0
280	1	37	14	0	0	0	0	0	0	0	0	43.5	27.5	1.58182	0	91	5.77	6.57	3.21	2.6	5.12	150	89.9	0	1	160	78	30.4688	0
281	0	37	7	0	0	0	0	0	0	0	0	41.3	32.5	1.27077	0	59	4.17	7	3.73	2.63	3.98	125	10.6	0	1	161	49	18.9036	0
282	1	51	11	1	1	0	0	1	0	0	0	36.9	35.1	1.05128	0	197	3.2	8.46	7.4	0.4	4.05	114	5.3	0	2	161	53	20.4467	1
283	1	73	15	0	0	0	0	0	0	0	0	37.8	23.6	1.60169	0	88	3.4	5.48	3.62	1.31	5.04	110	6.1	0	2	170	50	17.301	0
284	1	35	17	1	0	0	0	0	0	0	0	42.7	25.8	1.65504	0	89	3.5	6.57	3.58	2.26	4.72	139	4.2	0	2	188	103	29.1421	0
285	0	55	12	0	1	0	0	0	0	0	1	40.8	40.9	0.997555	0	70	4.51	8.21	5.92	1.56	4.45	130	874.1	0	2	167	70	25.0995	0
286	1	45	20	1	0	0	0	0	0	0	1	37.3	25.3	1.47431	0	87	4.16	4.37	2.05	1.7	4.51	137	55.9	0	1	163	65	24.4646	0
287	1	68	30	0	0	0	0	1	0	0	0	37.5	32.5	1.15385	0	75	3.84	5.64	3.07	1.85	4.59	138	10	0	1	168	67.5	23.9158	0
288	0	46	25	1	0	0	0	0	0	0	0	41.5	29.2	1.42123	1	46	3.76	5.86	3.4	1.67	4.1	117	36.8	0	1	153	50	21.3593	0
289	1	38	16	0	1	0	0	0	0	0	1	34.2	31.2	1.09615	0	108	2.85	8.76	6.44	1.56	4.38	132	8	0	1	172	55	18.5911	0
290	0	46	7	1	0	0	0	0	0	0	0	44.4	29.4	1.5102	0	57	4.4	4	1.62	1.91	4.29	124	141	0	2	156	51	20.9566	0
291	0	56	8	1	1	0	0	1	0	0	1	34.5	37.2	0.927419	0	65	4.25	7.71	4.13	2.68	4.05	113	120.6	0	1	170	62	21.4533	0
292	1	52	14	1	0	0	0	0	0	0	0	38.9	26.3	1.47909	0	89	3.54	4.57	2.14	1.54	4.68	171	109.3	0	2	172	62	20.9573	0
293	0	66	15	1	0	0	0	1	0	0	0	39.5	24.6	1.60569	0	76	3.92	5.59	2.91	2.2	4.05	125	102.2	0	2	156	60	24.6548	0
294	0	51	18	0	0	0	0	0	0	0	0	32.6	35.6	0.91573	0	175	3.18	7.42	4.78	2.03	3.75	104	39	0	1	170	64	22.1453	0
295	0	49	8	0	0	0	0	0	0	0	0	39.8	32.1	1.23988	1	66	4.44	4.96	2.77	1.61	4.7	144	79.3	0	1	158	50	20.0288	1
296	1	53	5	0	0	0	0	0	0	0	0	41.5	32.7	1.26911	0	534	4.03	15.56	12.49	2.01	3.38	104	53.1	0	1	165	67	24.6097	0
297	0	56	10	1	0	0	0	0	0	1	0	32.8	44.9	0.730512	0	141	2.94	4.81	2.93	1.46	2.82	82	49.3	0	2	160	66	25.7812	0
298	1	50	21	0	0	0	0	0	0	0	0	36.7	34.1	1.07625	0	122	4.27	7.61	4.07	1.52	4.82	142	137.8	0	2	165	61	22.4059	0
299	1	41	25	1	0	0	0	0	0	0	0	39.6	22.4	1.76786	0	71	3.65	3.92	2.34	1.17	5.56	117	63.7	0	1	158	56	22.4323	0
300	1	50	12	1	0	0	0	0	0	0	0	40.7	25.5	1.59608	0	85	5.23	4.32	3.12	0.93	3.02	92	8.3	0	1	172	70	23.6614	0
301	1	56	11	0	0	0	0	0	0	0	0	42.1	31.4	1.34076	0	77	3.93	3.43	1.55	1.43	4.03	135	6.9	0	1	165	57	20.9366	0
302	1	34	6	1	0	0	0	0	0	0	0	47.5	25.1	1.89243	0	76	3.97	7.1	3.32	3.3	4.73	143	34.4	0	2	180	85	26.2346	0
303	1	65	12	1	0	0	1	0	0	1	0	35	30.1	1.16279	0	178	2.65	10.87	9.02	1.1	3.88	116	1.5	0	2	175	70	22.8571	0
304	0	56	7	1	1	1	0	0	0	0	1	32.4	39.7	0.816121	0	66	3.39	7	5.22	1.18	2.91	84	55.2	0	2	156	58	23.833	0
305	1	43	6	0	0	0	0	0	0	0	0	41.6	34.1	1.21994	0	100	4.06	8.84	5.11	2.49	4.86	150	44.1	0	1	172	72	24.3375	0
306	0	67	10	0	0	0	0	1	0	0	1	39.7	25.3	1.56917	0	65	4.01	4.14	1.39	1.95	3.93	108	21.6	0	1	160	51	19.9219	0
307	1	45	7	0	0	0	0	0	0	0	0	39.3	31.3	1.25559	0	181	3.82	8.36	6.28	1.36	4.19	129	44.2	0	2	170	71	24.5675	0
308	0	50	8	0	0	0	0	0	0	0	0	38.9	28.8	1.35069	0	89	5.66	5.35	3.45	1.46	4.34	122	60.2	0	2	159	44	17.4044	0
309	0	46	12	0	0	1	0	1	0	0	0	32.6	37.1	0.878706	0	82	3.74	13.85	11.63	1.36	4.06	107	10.1	0	2	158	60	24.0346	0
310	0	68	15	0	0	0	0	1	0	1	0	39.1	25.8	1.5155	0	104	5.72	5.62	3.36	1.65	3.72	113	24.7	0	1	155	62	25.8065	0
311	1	52	10	0	0	0	0	0	0	0	0	40.3	30	1.34333	0	92	3.64	4.79	2.08	2.27	4.54	140	6.2	0	2	166	77	27.9431	0
312	0	68	13	0	0	0	0	0	0	0	0	40.1	28	1.43214	0	73	5.18	5.03	3.02	1.55	3.91	116	44	0	2	161	67	25.8478	0
313	1	61	6	0	0	0	0	1	0	1	0	39.1	24.4	1.60246	0	87	4.54	5.26	3.14	1.42	4.88	148	865.9	0	2	170	68	23.5294	0
314	1	60	15	0	0	0	0	0	0	0	0	37	29.3	1.2628	1	450	3.2	6.75	4.37	1.45	2.01	65	268.8	0	2	180	71	21.9136	0
315	1	53	13	1	0	0	0	0	0	0	0	40.7	26.5	1.53585	0	84	4.48	6.26	3.19	2.41	4.88	152	107.8	0	1	168	60	21.2585	0
316	0	65	11	0	0	1	0	0	0	0	0	30.2	37.2	0.811828	1	54	3.29	5.7	4.05	1.21	3.03	82	163.7	0	1	158	60	24.0346	0
317	0	46	7	0	1	0	0	0	0	0	0	36.4	34.2	1.06433	0	100	3.84	5.37	4.69	0.43	4.12	125	88	0	1	153	52.5	22.4273	1
318	1	56	16	0	0	0	0	0	0	0	0	38.7	32.2	1.20186	0	86	4.93	8.37	4.75	2.65	4.89	162	1900.6	0	2	168	64	22.6757	1
319	1	52	9	1	0	0	0	0	0	0	0	40.2	28.3	1.42049	0	82	4.35	4.58	3.44	0.77	4.56	135	10.3	0	2	161	57	21.9899	0
320	1	32	8	0	0	0	0	0	0	0	0	42.2	19.6	2.15306	0	81	2.86	5.7	2.91	2.15	4.41	142	28.8	0	1	164	57.5	21.3786	0
321	1	51	14	0	0	0	0	0	0	0	0	40.2	31	1.29677	0	85	3.66	7.24	5.2	0.77	4.3	135	34.9	0	2	167	68	24.3824	0
322	1	62	20	0	0	0	0	0	0	0	0	36	27.5	1.30909	0	92	4.02	5.15	2.91	1.55	4.33	134	149.3	0	2	173	63	21.0498	0
323	1	54	16	1	0	0	0	1	0	0	0	38	26.4	1.43939	0	126	2.85	5.85	2.63	2.36	4.21	135	15.5	0	2	158	49	19.6283	0
324	0	53	12	1	0	0	0	0	0	0	0	37.5	25.5	1.47059	0	58	5.22	4.49	2.11	1.54	3.84	118	210	0	2	160	49	19.1406	0
325	0	30	9	1	0	0	0	0	0	0	0	38	36.6	1.03825	0	85	4.42	4.29	2.66	1.18	4.01	110	1188.9	1	2	158	45.5	18.2262	0
326	0	68	20	1	0	0	0	0	0	0	0	37.6	28.2	1.33333	0	66	6.03	4.84	2.71	1.57	3.68	102	144.6	0	2	155	61	25.3902	0
327	0	58	4	1	0	0	0	1	0	0	0	37.3	27.6	1.35145	0	64	4.02	4.22	2.22	1.67	4.23	128	2.7	0	2	160	61.5	24.0234	0
328	1	51	12	0	0	0	0	1	0	0	0	39.7	33.7	1.17804	0	148	5.1	12.15	6.94	3.79	4.78	140	9.1	0	2	170	80	27.6817	0
329	1	52	16	1	0	0	0	0	0	0	1	35.2	31.1	1.13183	0	116	3.63	4.15	2	1.69	4.89	149	80	0	1	168	68	24.093	0
330	0	51	8	0	0	0	0	0	0	0	0	37.4	33.5	1.11642	0	61	4.33	5.42	2.97	1.66	4.6	131	43.5	0	2	158	59	23.634	0
331	1	43	10	0	0	0	0	0	0	0	0	37.7	28	1.34643	0	107	3.94	8.69	5.2	2.33	4.88	143	41	0	2	170	64	22.1453	0
332	1	36	20	1	0	0	0	0	0	0	1	36.9	26.7	1.38202	0	77	4.78	8.32	3.63	3.59	3.8	134	24.7	0	2	175	80	26.1224	0
333	1	44	11	0	0	0	0	0	0	0	0	43.3	22.3	1.9417	0	121	3.37	7.17	3.94	2.5	4.84	144	43	0	2	166	72	26.1286	0
334	0	67	10.1	0	0	0	0	1	0	0	0	39.5	28.5	1.38596	0	145	4.97	7.19	4.42	2.1	4.47	133	333.7	0	2	160	55	21.4844	0
335	1	69	15	1	0	0	0	1	0	0	0	38.1	30.6	1.2451	0	98	5.29	8.26	4.9	2.37	4.64	144	103.9	0	2	166	68	24.677	0
336	1	48	11	0	0	0	0	0	0	0	0	40.2	31	1.29677	0	116	2.99	7.97	4.87	1.94	4.92	150	10.1	0	2	175	80	26.1224	0
337	1	60	18	1	0	0	0	0	0	0	0	43.5	28.3	1.5371	0	220	5.5	7.49	5.02	1.86	3.78	112	45	0	2	165	63	23.1405	0
338	1	33	14	0	0	0	0	0	0	0	1	43.2	25.6	1.6875	1	72	3.31	5.18	2.62	2.06	5.35	158	85	0	2	170	72	24.9135	0
339	1	67	14	1	0	0	0	0	0	1	0	38	27.8	1.36691	0	74	5.62	4.52	2.18	1.58	4.9	157	225.2	0	2	170	70	24.2215	0
340	1	32	16	1	0	0	0	0	0	0	0	33.8	29.1	1.16151	0	68	5.23	10.47	6.41	3.08	4.88	148	208.5	0	2	176	75	24.2123	0
341	0	38	7	1	0	0	0	0	0	0	0	37.8	23.6	1.60169	0	57	3.5	9.29	6.36	2.28	4.68	129	85	0	2	157	61	24.7475	0
342	1	21	14	1	0	0	0	0	0	0	0	41.3	29.2	1.41438	0	89	3.58	10.59	8.9	1.06	4.46	133	314.3	0	1	174	72	23.7812	0
343	1	59	11	1	0	0	0	1	0	0	1	37.4	27.6	1.35507	0	86	4.36	4.02	1.58	1.83	4.17	130	45	0	1	178	76	23.9869	0
344	1	55	16	1	0	0	0	0	0	0	1	40	25	1.6	0	110	2.22	7.97	4.57	2.75	4.56	141	215.6	0	2	173	73	24.3911	0
345	0	54	25	1	0	0	0	1	0	0	0	41	33.6	1.22024	1	66	4.11	5.85	3.09	2.08	4.58	125	7598.7	1	2	153	65	27.7671	0
346	1	60	15	0	0	0	0	0	0	0	0	37.7	30.4	1.24013	0	1141	3.63	7.95	6.52	0.52	3.56	107	66.7	0	2	158	57	22.8329	0
347	1	45	8	1	0	0	0	1	0	0	0	44.7	28.6	1.56294	0	79	3.97	7.71	4.43	2.64	5.05	147	11	0	2	173	78	26.0617	0
348	1	48	12	0	0	0	0	0	0	0	0	38.9	26.9	1.4461	0	117	3.63	9.66	6.69	1.64	4.66	142	10	0	2	168	70	24.8016	0
349	0	70	8	1	0	0	0	0	0	0	0	36.1	23.4	1.54274	0	69	4.26	5.45	2.74	2.13	4.09	126	29.7	0	2	160	54	21.0938	0
350	0	52	9	1	0	0	0	0	0	0	1	31.1	41.5	0.749398	0	224	2.93	4.6	2.46	1.52	3.46	80	1986.3	0	2	160	45	17.5781	0
351	1	48	6	0	0	0	0	0	0	0	1	40.1	25.7	1.56031	0	88	3.9	8.16	5.07	2.14	4.54	135	34	0	2	175	81	26.449	0
352	1	54	19	0	0	0	1	0	0	0	0	40.2	21.6	1.86111	0	86	2.77	7.47	3.73	2.96	4.93	143	33.3	0	2	170	65	22.4913	0
353	1	65	14	0	0	0	0	1	0	0	0	38.5	25.8	1.49225	0	76	3.68	9.88	7.96	0.9	4.19	133	10	0	2	175	78	25.4694	0
354	1	31	9	0	0	0	0	0	0	0	0	43.5	24	1.8125	0	90	4.49	5.03	2.68	1.75	4.56	145	101	0	1	176	74	23.8895	0
355	1	42	8	0	0	0	0	0	0	0	0	41.1	24.4	1.68443	0	71	4.73	4.16	2.01	1.69	5	165	36	0	2	177	88	28.089	0
356	0	24	8.7	0	0	0	0	0	0	0	1	43.4	35.8	1.21229	0	60	3.98	7.01	3.61	2.9	4.15	121	1163	0	3	157	58	23.5304	0
357	1	34	12	1	0	0	0	0	0	0	0	42.7	28.7	1.4878	0	88	3.35	6.67	3.01	2.81	4.45	135	139.2	0	2	172	72	24.3375	0
358	1	35	12	0	0	0	0	0	0	0	0	40.1	30.6	1.31046	0	95	3.84	7.41	3.77	2.65	5.43	169	120.5	0	2	162	74	28.1969	0
359	1	32	25	1	0	0	0	0	0	0	0	40.7	27.4	1.4854	0	77	4.04	8.54	4.38	3.2	4.75	144	27.6	0	2	167	63	22.5896	0
360	1	56	7	0	0	0	0	0	0	0	0	40.1	24.5	1.63673	0	56	3.24	4.06	2.23	1.4	4.29	124	201.3	0	1	170	69	23.8754	0
361	0	32	12.5	1	0	0	0	0	0	0	1	42.2	28.8	1.46528	1	131	3.39	5.99	2.7	2.73	4.39	107	29.4	0	1	158	75	30.0433	0
362	0	46	10	1	0	0	0	0	0	0	0	43.6	29.5	1.47797	0	49	3.59	6.05	3.59	1.93	3.99	128	89.8	0	2	156	55	22.6003	0
363	1	52	33	1	0	0	0	0	0	0	0	38.4	26.2	1.46565	0	60	4.32	6.24	3.05	2.46	4.34	136	82.6	0	2	171	85	29.0688	0
364	1	46	12	1	0	0	0	0	0	0	0	51.3	34.1	1.5044	0	64	5.21	11.11	6.83	3.16	4.96	148	31.1	0	1	169	81	28.3604	0
365	1	55	15	1	0	0	0	0	0	0	0	41.8	29.4	1.42177	0	90	3.13	6.08	2.79	2.36	4.43	143	42.1	0	2	170	65	22.4913	0
366	1	54	15	0	0	0	0	0	0	0	0	39.4	26.8	1.47015	0	78	2.88	4.24	2.26	1.46	4.84	147	31.5	0	1	168	65	23.03	0
367	1	58	8	0	0	0	0	1	0	1	0	33.7	28.6	1.17832	0	86	3.67	12.72	10.99	0.8	3.96	122	35.5	0	1	167	76	27.2509	0
368	1	53	18	0	0	0	0	0	0	0	0	39.5	29.7	1.32997	0	89	4.4	6.27	3.36	2.03	5.09	158	153.2	0	1	169	76	26.6097	0
369	0	44	11	1	0	0	0	0	0	0	0	42.6	25.2	1.69048	0	73	3.01	4.86	3.07	1.34	4.98	140	85.5	0	1	170	75	25.9516	0
370	1	54	18	1	0	0	0	0	0	0	0	46.9	28	1.675	0	64	5.79	5.57	3.11	1.88	4.86	145	115.8	0	2	160	55	21.4844	0
371	1	54	8	1	0	0	0	0	0	0	0	35.8	26.9	1.33086	0	566	2.45	9.88	7.29	1.94	2.96	87	9.1	0	2	173	78	26.0617	0
372	1	52	8	1	0	0	0	1	0	0	0	45.8	27.9	1.64158	0	86	4.75	7.76	5.46	1.88	4.84	145	10.5	0	2	165	75	27.5482	0
373	1	52	14	1	0	0	0	1	0	0	0	44.3	27.1	1.63469	0	132	4.39	4.99	3.05	1.45	4.67	131	26.9	0	1	168	83	29.4076	0
374	1	26	14.4	0	0	0	0	0	0	0	1	47.3	28.5	1.65965	0	84	3.92	5.48	2.77	2.18	4.81	149	44.1	0	1	170	70	24.2215	0
375	1	45	10	1	0	0	0	0	0	0	0	40	22.2	1.8018	0	78	4.6	7.13	3.76	2.54	4.81	146	87.3	0	2	168	62	21.9671	0
376	0	60	7.8	0	0	0	0	0	0	0	0	38	25.6	1.48438	0	67	3.57	4.63	2.39	1.86	3.72	115	43.7	0	2	150	65	28.8889	0
377	1	53	5	1	0	0	0	1	0	1	0	44.5	20.8	2.13942	0	89	5.05	5.13	3.27	0.84	4.34	136	24.7	0	2	170	74	25.6055	0
378	1	67	9	1	0	0	0	0	0	0	0	41.1	35.5	1.15775	0	78	3.72	7.03	5.53	0.73	4.91	149	2.4	0	2	171	60	20.5191	0
379	1	40	18	0	0	0	0	0	0	0	1	41.8	25.6	1.63281	0	108	2.88	5.51	2.97	2.17	4.09	134	26.2	0	2	176	69	22.2753	0
380	1	30	18	1	0	0	0	0	0	0	0	46	26.1	1.76245	0	84	3.71	8.26	4.77	2.75	4.66	142	14.4	0	1	180	81	25	0
381	1	65	12	1	0	0	0	0	0	0	0	38.3	26.7	1.43446	0	112	3.88	7.3	4.09	2.55	4.76	139	26.3	0	1	160	62	24.2188	0
382	0	53	16	1	0	0	0	0	0	0	1	39.7	24.5	1.62041	0	63	4.58	4.84	1.92	2.45	3.86	119	79.9	0	1	162	52	19.8141	0
383	0	53	11	1	0	0	0	1	0	0	0	46.8	38.4	1.21875	1	64	4.46	7.33	4.96	1.79	5.56	138	937.6	1	1	150	63	28	0
384	0	53	10	1	0	0	0	0	0	1	0	39.7	30.3	1.31023	0	61	3.06	3.39	1.57	1.51	3.92	116	68.5	0	1	160	65	25.3906	0
385	1	46	9	1	0	0	0	0	0	0	0	39.9	31.1	1.28296	0	202	5.06	7.8	5.06	1.91	3.96	132	3.4	0	2	164	64	23.7954	0
386	1	35	6	1	0	0	0	0	0	0	0	43	27.7	1.55235	0	150	3.81	6.17	3.36	2.14	4.85	152	45	0	1	170	70	24.2215	0
387	1	78	16	1	0	0	0	1	0	0	0	39.2	27.7	1.41516	0	261	3.52	6.71	4.34	1.61	5.2	152	10.2	0	1	162	60	22.8624	0
388	0	47	16	1	0	0	0	0	0	0	0	40.7	26.4	1.54167	0	54	3.67	4.21	1.83	2.01	3.53	93	102.6	0	1	158	50	20.0288	0
389	1	49	22	0	0	0	0	0	0	0	0	39.5	32.8	1.20427	1	66	3.84	4.61	2.65	1.52	4.08	130	42	0	2	167	65	23.3067	0
390	1	55	8	0	0	0	0	0	0	0	0	40.7	26.9	1.51301	0	65	4.23	7.54	3.82	2.86	5.15	161	36.2	0	2	160	57	22.2656	0
391	1	29	7	1	0	0	0	0	0	0	0	46.2	28.9	1.59862	0	82	4.25	10.54	4.77	4.29	5.6	165	17.1	0	2	175	75	24.4898	0
392	1	61	17	0	0	0	0	1	0	0	0	43.8	41.1	1.06569	0	201	5.19	6.47	3.25	2.04	4.22	140	2.3	0	2	170	63	21.7993	0
393	1	34	8	0	0	0	0	0	0	0	0	44.8	24	1.86667	0	53	4.73	6.2	3.66	2.04	5.33	160	8.5	0	2	166	75	27.2173	0
394	0	48	8	0	0	0	0	0	0	0	0	39.6	36.4	1.08791	0	85	4.71	6.07	3.31	1.91	4.29	125	141.8	0	2	160	59	23.0469	0
395	1	43	14	0	0	0	0	1	0	0	1	47	32.9	1.42857	0	125	3.71	7.15	3.74	2.57	4.94	151	4.2	0	2	170	79	27.3356	0
396	1	50	16	0	0	0	0	0	0	1	0	38.3	22.4	1.70982	0	90	3.95	6.36	3.93	1.92	4.09	117	1230.7	0	2	168	58.5	20.727	0
397	1	27	15	1	1	0	0	0	0	0	0	39.1	33.3	1.17417	0	83	5.36	6.38	4.41	1.25	4.3	135	7.5	0	2	170	80	27.6817	0
398	1	61	9	0	0	0	0	0	0	0	1	40.6	29.8	1.36242	0	89	4.71	7.63	5.51	1.42	4.4	142	16.5	0	2	162	66	25.1486	0
399	1	53	15	0	0	0	0	1	0	0	1	38.5	27.6	1.39493	0	179	3.42	5.49	3.46	1.24	4.26	124	12.9	0	2	172	80	27.0416	0
400	1	58	14	0	0	0	0	0	0	0	0	40.9	24.4	1.67623	1	83	4.19	7.84	3.04	2.05	4.09	127	75.1	1	2	162	60	22.8624	0
401	1	57	8	0	0	0	0	1	0	0	1	38.4	21.4	1.79439	0	139	4.09	5.52	3.26	1.55	4.59	135	5	0	2	173	75	25.0593	0
402	1	52	9	1	0	0	0	0	0	0	1	37.8	26.8	1.41045	0	79	3.78	6.93	5.2	1.36	4.55	132	32.2	0	1	168	60	21.2585	0
403	1	45	10	1	0	0	0	0	0	0	0	43	31.5	1.36508	0	117	3.9	7.58	4.95	1.74	4.62	140	15	0	2	178	72	22.7244	0
404	1	40	11.4	1	0	0	0	0	0	0	1	40.9	23.2	1.76293	0	75	4.24	6.46	3.4	2.21	4.05	140	103.2	0	2	166	70	25.4028	0
405	1	43	9	0	0	0	0	0	0	0	0	42.4	30.9	1.37217	1	70	4.6	5.87	3.67	1.73	4.94	144	8.6	0	2	160	53	20.7031	0
406	0	43	13	1	0	0	0	0	0	0	0	35.1	29.3	1.19795	0	48	2.42	8.01	5.8	1.48	3.3	97	84.2	1	2	156	54	22.1893	0
407	0	50	15	0	0	0	1	1	0	0	0	33.3	36.4	0.914835	0	57	3.06	10.81	7.23	2.61	3.49	100	10.8	0	2	160	91	35.5469	1
408	1	56	10	0	0	0	0	0	0	0	1	31.7	28.7	1.10453	0	92	3.08	11.4	8.45	2.03	4.05	127	44.9	0	2	178	74	23.3556	1
409	1	41	5	1	0	0	0	0	0	0	0	39.1	32.7	1.19572	0	95	3.11	6.33	2.77	2.71	4.5	135	7.3	0	2	173	71	23.7228	0
410	1	53	15	0	0	0	0	0	0	1	1	37.8	23.1	1.63636	0	85	4.31	5.25	2.32	2.53	4.69	142	8.7	0	1	177	86	27.4506	0
411	1	48	12	1	0	0	0	0	0	0	0	37.9	26.1	1.45211	0	102	4.59	5.65	2.91	2.19	4.45	141	20	0	2	171	78	26.6749	0
412	1	46	8	1	0	0	0	1	0	0	0	40.1	33.3	1.2042	0	114	4.65	5.23	3.1	1.39	5.07	159	20	0	2	177	70	22.3435	0
413	1	39	15	0	0	0	0	0	0	0	0	48.4	27.5	1.76	0	89	4.63	9.82	5.15	3.36	4.8	146	42.2	0	2	178	78	24.6181	0
414	1	26	8	0	0	0	0	0	0	0	0	41	30.8	1.33117	0	102	3.66	9.48	7.01	1.26	4.69	141	45	0	2	172	70	23.6614	0
415	0	62	19	0	0	0	0	0	0	0	1	37.6	28.1	1.33808	0	46	3.76	6.23	4.31	1.47	4.19	125	16.8	0	2	152	45	19.4771	0
416	1	43	13	1	0	0	0	0	0	0	0	42	26	1.61538	0	66	2.98	8.19	5.15	2.22	4.66	139	114.2	0	2	169	74	25.9095	0
417	0	51	8	1	0	0	0	0	0	0	0	43.9	24.6	1.78455	0	59	4.8	5.71	3.33	1.85	4.71	133	47.6	0	2	158	60	24.0346	0
418	1	46	4	1	0	0	0	0	0	0	0	37.1	26.5	1.4	0	61	4.2	3.96	1.41	1.95	4.49	138	19.3	0	1	168	74	26.2188	0
419	1	35	10	0	0	0	0	0	0	0	1	44.9	27.7	1.62094	0	72	4	6.42	3.64	2.31	4.97	155	21.4	0	2	172	79	26.7036	0
420	0	60	10	0	0	0	0	1	0	0	0	36.7	32.9	1.1155	0	65	4.29	5.58	3.74	1.41	3.81	114	22.6	0	2	145	47.5	22.5922	0
421	1	45	24	0	0	0	0	0	0	0	0	37.1	34.3	1.08163	0	90	3.65	6.2	3.29	2.4	5.01	148	200	0	2	170	85	29.4118	0
422	0	46	30	1	0	0	0	0	0	0	0	35.9	26.7	1.34457	0	46	4.25	4.84	2.8	1.65	4.15	128	36	0	2	158	52	20.83	0
423	1	30	12	0	0	0	0	0	0	0	0	41.2	28.8	1.43056	0	79	5.62	7.67	4.69	2.07	4.4	136	51.1	0	2	172	81	27.3797	0
424	0	44	11	1	0	0	0	0	0	0	0	39.2	29.2	1.34247	0	68	4.4	6.22	4.34	1.3	4.16	125	70.1	0	1	155	53	22.0604	0
425	1	54	10	0	0	0	0	0	0	0	0	39	28.8	1.35417	0	68	3.87	4.47	2.56	1.37	4.96	126	19.2	0	2	153	70	29.903	0
426	0	49	14	0	0	0	0	1	0	0	0	31.9	32.6	0.978528	0	67	3.59	3.14	1.34	1.38	3.4	107	201	0	2	155	53	22.0604	0
427	1	54	20	1	0	0	0	1	0	0	0	43.1	24.8	1.7379	0	59	3.88	5.55	3.85	1.1	4.31	130	72.7	0	1	169	58	20.3074	0
428	1	62	9	0	0	0	0	0	0	0	0	40.1	26.5	1.51321	0	239	5.46	5.95	4.27	1.15	4.06	132	13.3	0	2	170	68	23.5294	0
429	0	45	16	1	0	0	0	0	0	0	0	41.1	26.9	1.52788	0	57	4.98	4.41	2.45	1.57	4.06	126	421	0	1	152	61	26.4024	0
430	1	42	15	0	0	0	0	0	0	0	0	48.4	27.9	1.73477	0	76	4.93	7.01	4.19	2.03	4.72	149	26	0	2	160	67	26.1719	0
431	0	45	14	0	0	0	0	0	0	0	0	38.8	34.5	1.12464	1	53	4.91	5.94	3.53	1.85	3.7	114	1067.1	1	2	160	52	20.3125	0
432	1	29	20	0	0	0	0	0	0	0	0	44.7	26.5	1.68679	0	80	4.16	8	5.31	2.04	4.98	156	5.9	0	1	170	83	28.7197	0
433	0	60	12	0	0	0	0	0	0	0	0	40.8	29	1.4069	1	79	4.7	5.72	2.51	2.55	4.58	122	854.3	1	1	155	53	22.0604	0
434	0	57	9	0	0	0	0	0	0	0	0	40.6	28.7	1.41463	0	66	3.42	6.29	4.03	1.37	3.47	106	12	0	2	163	56	21.0772	0
435	1	52	27	1	0	0	0	0	0	0	0	41.5	28.5	1.45614	0	82	4.22	5.28	2.95	1.78	4.48	137	33.6	0	2	175	82	26.7755	0
436	1	67	13	0	0	0	0	1	0	0	0	35	31.8	1.10063	0	93	3.38	7.57	4.77	2.6	4.38	134	7.5	0	1	172	69	23.3234	0
437	0	79	8	1	0	0	0	0	0	0	0	34.2	33	1.03636	1	83	3.82	5.31	2.62	1.81	5.19	102	245	0	1	150	46	20.4444	0
438	1	50	16	0	0	0	0	1	0	0	1	32.8	27.7	1.18412	0	397	4	7.01	4.67	1.79	3.92	110	38.4	0	2	164	64	23.7954	0
439	0	60	9	0	0	0	0	1	0	1	0	43.7	30.2	1.44702	1	136	4.19	5.82	3.47	1.87	3.44	106	1619.9	1	2	158	77	30.8444	1
440	1	43	17	1	0	0	0	0	0	0	0	40.9	27.2	1.50368	0	66	4.13	4.34	1.62	2.07	4.25	140	245.4	0	1	180	86	26.5432	0
441	1	47	10	0	0	0	0	1	0	0	0	44.9	27.9	1.60932	0	95	3.59	5.53	3.42	1.6	4.23	139	0.5	0	2	170	79	27.3356	0
442	1	77	12	1	0	1	0	0	0	0	1	30	31.9	0.940439	0	212	3.91	8.8	7.2	1.14	3.17	92.8	16.4	0	2	162	45	17.1468	0
443	1	46	8	1	0	0	0	0	0	0	0	38.5	30.7	1.25407	0	106	4.19	4.53	2.18	1.87	4.86	140	30	0	1	176	74	23.8895	0
444	0	56	6.5	1	0	0	0	0	0	0	0	32.1	28.9	1.11073	0	95	1.89	7.22	3.45	2.16	3.84	115	11.8	0	2	156	47	19.313	0
445	1	65	11.2	0	0	0	0	1	0	0	0	41.6	35.6	1.16854	0	89	4.38	6.61	4.02	2.05	4.85	147	20.4	0	2	180	72	22.2222	0
446	1	52	11	0	0	0	0	0	0	0	0	37.6	25.4	1.48031	0	76	4.18	6.28	2.36	3.29	4.13	124	37.6	0	1	168	68	24.093	0
447	1	44	20	1	0	0	0	0	0	0	0	40	33.6	1.19048	0	101	3.79	7.89	5.09	2.2	4.75	142	55.7	0	2	172	71	23.9995	0
448	1	72	5	1	0	0	0	0	0	0	0	40.2	43	0.934884	0	130	4.61	9.67	6.76	2.14	4.89	148	13	0	2	170	70	24.2215	0
449	0	45	8.4	1	0	0	0	0	0	0	0	43.6	30.4	1.43421	0	64	6.07	6.13	3.7	1.72	4.44	140	164.9	0	2	150	49	21.7778	0
450	1	57	15	1	0	0	0	0	0	0	0	38.2	28.7	1.33101	0	75	4.37	5.5	2.73	2.14	4.78	153	22	0	1	163	65	24.4646	0
451	1	45	12	1	0	0	0	0	0	0	0	41	23.2	1.76724	0	69	4.55	5.7	2.91	1.93	4.42	150	50.1	0	1	160	55	21.4844	0
452	0	46	12	0	0	0	0	0	0	0	0	42	29.6	1.41892	0	60	5.73	5.7	3.15	1.99	3.82	123	33	0	1	160	68	26.5625	0
453	0	47	22	1	0	0	0	1	0	0	1	40.2	31.9	1.26019	0	62	4.44	6.79	3.84	2.11	3.96	114	22.5	0	1	163	72	27.0993	0
454	1	21	14.1	1	0	0	0	0	0	0	0	43.8	20.8	2.10577	0	122	2.62	6.31	3.71	1.97	4.48	134	230.1	0	1	163	60	22.5827	0
455	0	55	6.2	1	0	0	0	0	0	0	0	39.2	32.5	1.20615	0	44	5.67	4.24	1.44	2.39	4.49	130	661.3	0	2	148	48	21.9138	0
456	1	44	7	1	0	0	0	0	0	0	0	38.2	22.6	1.69027	0	78	3.85	6.2	2.88	2.37	4.71	148	173.8	0	1	170	75	25.9516	0
457	1	47	12	1	0	0	0	0	0	0	0	42.6	27.3	1.56044	0	83	4.28	5.38	3.21	1.56	4.62	140	883.7	0	1	175	70	22.8571	0
458	1	40	5.8	0	0	0	0	0	0	0	0	41.8	25.8	1.62016	0	68	3.96	6.02	3.31	2.14	4.7	145	7	0	2	183	91	27.1731	0
459	1	74	19	1	0	0	0	1	0	0	0	34.4	38.1	0.902887	0	67	4.01	4.05	1.95	1.43	4.22	138	46.7	0	1	162	50	19.052	0
460	0	58	15	0	0	0	0	1	0	1	1	40.1	34	1.17941	0	70	4.81	7.53	4.24	2.67	5.26	117	1237.6	0	2	156	74	30.4076	0
461	1	52	10	0	0	0	0	1	0	1	1	38	27.2	1.39706	0	87	4.13	8.13	5.02	2.22	4.64	149	37.9	0	2	168	78	27.6361	0
462	1	74	8	0	0	0	0	0	0	0	0	44.8	28.9	1.55017	0	83	4.87	8.03	4.45	2.81	5	164	20.7	0	1	175	65	21.2245	0
463	1	29	9	0	0	0	0	0	0	0	1	41.6	27.5	1.51273	0	85	4.24	7.49	2.39	4.07	5.32	160	18.9	0	1	180	93	28.7037	0
464	1	42	21	0	0	0	0	1	0	0	1	35.2	34.8	1.01149	0	93	4.12	9.19	6.89	1.49	5	138	59	0	1	175	78	25.4694	0
465	1	59	10	0	0	0	0	0	0	0	0	41.4	22.4	1.84821	0	94	3.29	6.01	4.07	1.3	3.91	127	22	0	3	167	61	21.8724	0
466	1	33	15	0	0	0	0	0	0	0	0	47.5	31	1.53226	0	72	5.05	11.08	9.94	0.74	5.03	158	95.1	0	1	174	77	25.4327	0
467	1	36	7	1	0	0	0	0	0	0	1	42.3	29.7	1.42424	0	74	4.37	13.07	9.28	2.43	5.29	150	17	0	2	167	79	28.3266	0
468	1	42	13	1	0	0	0	0	0	0	0	38.8	25.2	1.53968	0	75	4.21	7.84	5.29	1.37	4.77	149	64.5	0	1	173	65	21.7181	0
469	0	52	11	0	0	0	0	0	0	0	1	35.5	30.4	1.16776	0	62	4.79	3.66	1.91	1.32	4.01	122	28.1	0	1	156	80	32.8731	0
470	1	36	15	0	0	0	0	0	0	0	0	43	25.6	1.67969	0	70	3.98	5.56	2.72	2.21	4.15	129	49.3	0	1	168	57	20.1956	0
471	1	61	10	1	0	0	0	1	0	0	1	38.1	37.3	1.02145	0	177	5.17	6.29	3.45	2.27	4.06	128	133.1	0	2	167	80	28.6851	0
472	1	34	9	1	0	0	0	0	0	0	0	41.4	27.2	1.52206	0	63	2.96	8.11	3	3.61	5.08	158	12	0	2	174	70	23.1206	0
473	1	47	5	0	0	0	0	0	0	0	0	43.3	25.5	1.69804	0	76	5.91	5.06	2.42	2.15	5.02	160	45.4	0	1	178	70	22.0932	0
474	1	54	14	0	0	0	0	0	0	0	1	38.6	29.8	1.2953	1	73	4.07	9.16	7.67	0.98	4.18	131	14327.2	0	2	179	64	19.9744	0
475	1	37	14	1	0	0	0	0	0	0	0	36.1	25.9	1.39382	0	73	3.37	7.65	3.87	2.84	4.22	137	992.2	0	2	172	93	31.4359	0
476	0	43	12	1	1	0	0	0	0	0	0	32	37.7	0.848806	0	117	6.15	19.87	17.7	1.51	3.56	102	1287.2	0	2	160	65	25.3906	0
477	0	43	18	0	0	0	0	0	0	0	0	40.7	25.8	1.57752	0	59	4.22	5.02	3.27	1.26	4.38	129	24.1	0	1	163	60	22.5827	0
478	1	33	24	1	0	0	0	0	0	0	1	43.4	28.1	1.54448	0	70	3.66	6.69	4.32	2.14	5.07	152	82.8	0	1	173	78	26.0617	0
479	1	62	8	0	0	0	0	0	0	0	1	39.9	31.4	1.2707	0	253	5.26	4.69	3.26	1.13	4.5	150	57.3	0	2	165	68	24.977	0
480	1	64	14	0	1	0	0	1	0	0	1	37.1	26.5	1.4	0	97	2.97	6.06	4.44	0.9	4.07	121	11.5	0	2	170	70	24.2215	0
481	0	51	20	0	0	0	0	0	0	0	0	40.2	29.7	1.35354	0	86	3.69	7.57	3.95	2.82	3.95	118	125	0	1	150	59	26.2222	0
482	1	26	8	0	0	0	0	0	0	0	1	43.5	23.7	1.83544	0	74	3.85	5.45	2.65	2.21	5.02	153	201	0	2	172	61	20.6193	0
483	1	26	6	1	0	0	0	0	0	0	1	40.9	27.4	1.4927	0	92	2.58	11.65	6.98	2.86	4.85	147	45	0	1	165	49	17.9982	0
484	1	34	12	1	0	0	0	0	0	0	0	41	29.2	1.40411	0	102	2.65	5.49	3.23	1.74	4.86	149	43.6	0	1	170	70	24.2215	0
485	0	36	7	0	0	0	0	0	0	0	0	38.5	25.4	1.51575	0	47	3.65	4.07	2.56	1.19	4.21	138	23.7	0	2	155	55	22.8928	0
486	1	72	13	1	0	0	0	0	0	0	0	40.8	35.1	1.16239	1	141	4.53	7.88	5.26	1.07	4.7	149	583.6	1	2	170	70	24.2215	0
487	1	59	18	1	0	0	0	0	0	0	0	44.4	30.1	1.47508	0	72	4.59	6.36	2.97	2.81	4.76	148	19.7	0	2	179	76	23.7196	0
488	0	61	8	1	0	1	1	0	0	1	0	35.2	33	1.06667	0	92	4.46	11.56	7.36	2.96	3.65	111	45	0	2	156	58	23.833	0
489	0	44	20	1	0	0	0	0	0	0	1	38.7	26.8	1.44403	1	72	4.08	7.07	3.33	2.85	4.4	124	3063.2	1	2	155	53	22.0604	0
490	1	45	13	1	0	0	0	0	0	0	1	38.8	20.7	1.8744	0	88	3.01	4.08	2.55	0.97	4.66	141	6.9	0	1	166	68	24.677	0
491	0	53	23	0	0	0	0	1	0	0	0	37.5	23	1.63043	1	104	5.9	3.66	2.23	1.06	3.63	120	40.3	0	2	167	70	25.0995	0
492	0	64	13	0	0	0	0	0	0	0	1	40.7	27.4	1.4854	1	92	5.88	7.02	3.7	2.43	4.22	133	178.9	0	3	163	72	27.0993	0
493	1	66	12	0	0	0	0	0	0	0	1	41.4	30.6	1.35294	0	99	3.29	5.02	2.9	1.69	4.43	146	7.2	0	2	170	64	22.1453	0
494	1	50	10	1	0	0	0	1	0	0	0	36.6	26.1	1.4023	0	143	4.32	5.65	2.09	2.41	4.13	130	22.3	0	2	165	75	27.5482	0
495	1	36	12	1	0	0	0	0	0	0	0	44.2	24.5	1.80408	0	107	5.03	5.74	3.4	1.7	4.57	133	75.8	0	2	178	85	26.8274	0
496	1	47	18	0	0	0	0	1	0	0	0	39.4	24.6	1.60163	0	75	4.72	6.98	3.82	2.44	4.61	134	129.5	0	1	160	64	25	0
497	0	72	16	0	0	0	0	1	0	0	0	40.7	28.7	1.41812	0	93	4.89	7.03	5.45	0.99	3.95	113	30.5	0	1	155	52	21.6441	0
498	1	52	26	0	0	0	0	0	0	1	0	34.9	26.6	1.31203	0	831	3.96	9.34	7.5	1.16	4.17	139	201	0	1	172	79	26.7036	0
499	1	62	10	0	0	0	0	0	0	1	0	36.7	36	1.01944	0	226	3.75	6.46	4.13	1.32	4.52	139	351.8	0	2	168	63	22.3214	0
500	1	59	19	0	0	0	0	1	0	0	0	41.1	26.2	1.5687	0	123	5.69	7.25	5.19	1.41	5.11	147	84.4	0	2	160	63	24.6094	0
501	1	47	10	1	0	0	0	0	0	0	0	41.7	33.6	1.24107	0	68	4.82	6.3	2.99	2.43	3.76	119	10.4	0	2	170	75	25.9516	0
502	0	53	13	1	0	0	0	0	0	0	0	44.6	29.7	1.50168	1	63	4.49	4.17	1.75	1.9	4.36	132	5253	1	1	158	51	20.4294	1
503	0	42	12	1	1	0	0	0	0	0	0	36.1	34.6	1.04335	0	64	3.24	3.88	2.38	0.79	3.98	128	94.4	0	2	158	65	26.0375	0
504	1	54	7	1	0	0	0	1	0	0	1	38.7	28.7	1.34843	0	89	4.28	6.03	3.25	1.63	4.67	148	3.9	0	1	170	79	27.3356	0
505	1	42	17	1	0	0	0	0	0	0	0	43	24.1	1.78423	0	62	5	5.94	3.66	1.61	4.78	143	11	0	2	170	65	22.4913	0
506	1	77	15	1	0	0	0	0	0	0	0	37.5	28.4	1.32042	0	78	3.06	5.61	3.03	1.33	4.16	126	24	0	2	168	55	19.487	0
507	1	63	8	1	0	0	0	0	0	0	0	36.3	27.1	1.33948	0	107	3.56	4.97	2.2	2.1	3.98	115	130.9	0	2	172	49	16.563	0
508	1	54	9	0	0	0	0	0	0	0	0	39.3	20.4	1.92647	0	153	3.76	4.51	2.28	1.92	3.8	112	17.9	0	2	169	56	19.6072	0
509	1	30	9	0	0	0	0	0	0	0	0	39.6	31.2	1.26923	0	98	5.76	8.23	3.59	3.41	5.25	152	13.1	0	2	168	66	23.3844	0
510	0	53	13	0	0	0	0	0	0	0	1	37.7	28.7	1.31359	0	75	3.46	4.04	2.01	1.58	4.18	120	459.1	0	2	167	49	17.5697	0
511	0	58	11	1	1	1	0	0	0	0	0	28.5	30.4	0.9375	0	106	2.8	9.38	8.22	0.77	4.37	102	11.6	0	1	150	55	24.4444	0
512	1	73	15	1	0	1	0	0	0	0	1	38.4	32.5	1.18154	0	87	5.62	6.87	3.11	2.53	4.41	129	587.2	0	2	168	75	26.5731	0
513	1	50	35	0	0	0	0	0	0	0	0	40.3	30	1.34333	0	63	3.42	13.95	9.17	3.43	5.2	151	187.4	0	1	167	75	26.8923	0
514	1	34	7	1	0	0	0	0	0	0	0	40.6	27.2	1.49265	0	81	4.28	8.44	5.23	2.46	5.24	159	81.2	0	1	175	90	29.3878	0
515	1	61	12	1	0	0	0	1	0	0	1	40	35.6	1.1236	0	74	5.14	7.11	4.13	2.23	5.18	146	18.9	0	2	172	63	21.2953	0
516	1	48	10	1	0	0	0	0	0	0	0	40.8	22.5	1.81333	0	95	4.94	5.63	3.03	2.08	4.43	133	42.2	0	2	168	62	21.9671	0
517	1	63	8	0	0	0	0	1	0	0	0	41.4	27.1	1.52768	0	66	4.02	5.05	2.67	1.81	3.98	120	20.4	0	2	170	101	34.9481	0
518	0	50	20	1	0	0	0	0	0	0	0	38.9	31.9	1.21944	0	82	4.2	7	4.98	1.29	4.61	135	65.3	0	2	165	100	36.7309	0
519	1	57	13	0	0	0	0	0	0	0	0	37.9	25	1.516	0	88	3.51	3.67	2.02	1.22	3.75	120	4.8	0	2	170	67	23.1834	0
520	1	35	18	0	0	0	0	0	0	0	0	39.2	21.4	1.83178	0	82	4.65	6.78	4.11	1.85	4.43	133	61.5	0	2	170	71	24.5675	0
521	0	43	10	1	0	0	0	0	0	0	0	36.2	24.3	1.48971	0	63	4.27	5.05	2.72	1.58	4.28	123	174.2	0	1	153	60	25.6312	0
522	1	43	11	1	0	0	0	0	0	0	0	38.4	28.5	1.34737	0	81	3.67	5.89	2.39	2.64	4.4	129	10	0	2	171	61.5	21.0321	0
523	1	33	13	0	0	1	0	0	0	0	0	36.5	33.9	1.0767	0	86	3.52	6.85	4.03	1.81	3.55	105	302.2	0	2	170	60	20.7612	0
524	1	43	11	1	0	0	0	0	0	0	0	38.6	33.6	1.14881	0	130	4.54	7.98	4.7	2.21	5.23	148	73.6	0	2	165	82	30.1194	0
525	1	43	15	0	0	0	0	1	0	0	0	43.3	23.8	1.81933	0	112	3.83	6.91	3.58	2.19	4.61	145	27.7	0	2	170	71	24.5675	0
526	0	47	15	0	0	0	0	0	0	0	1	36.8	29.8	1.2349	0	88	4.25	8.95	5.53	2.89	4.06	127	3735.3	0	2	158	55	22.0317	0
527	0	55	15	0	1	0	0	0	0	1	0	26.3	34.2	0.769006	0	83	2.26	10.91	8.62	1.32	3.54	96	761.1	1	2	160	79.5	31.0547	0
528	1	49	10	0	1	0	0	0	0	0	0	40.9	36.7	1.11444	0	77	4.81	6.65	4.1	1.93	5.26	155	619.6	0	2	166	74	26.8544	1
529	1	46	15	0	0	0	0	0	0	0	0	42	25.4	1.65354	0	85	4.27	6.85	4.09	2.13	4.99	158	75.5	0	1	167	67	24.0238	0
530	1	62	18	0	0	0	0	0	0	1	0	38	29.8	1.27517	0	329	4.41	10.38	7.14	2.16	5.11	145	42	0	2	161	65	25.0762	0
531	1	44	8	0	0	0	0	0	0	0	0	43.2	32.1	1.34579	0	68	4.53	6.03	3.31	2.07	4.41	141	92.3	0	1	174	84	27.7447	0
532	1	46	16	1	0	0	0	0	0	0	0	42.2	22.7	1.85903	0	109	3.67	4.83	2.88	1.54	5.31	162	88.5	0	1	170	71	24.5675	0
533	1	69	16	1	0	0	0	1	0	0	1	38.6	29.7	1.29966	0	61	3.32	8.6	4.81	2.17	4.54	143	30.4	0	2	159	44.5	17.6022	0
534	1	33	6	1	0	0	0	1	0	1	0	33.3	25.6	1.30078	0	304	3.94	8.86	6.37	1.66	3.62	103	10.8	0	1	172	67	22.6474	0
535	1	37	15	1	0	1	0	0	0	0	0	44.8	37	1.21081	1	89	5.98	6.58	3.42	2.14	5.2	158	494.8	0	1	171	75	25.6489	0
536	1	25	25	1	1	0	0	0	0	0	1	41.1	25.5	1.61176	0	83	3.14	7.63	3.83	3.17	5.33	156	0	0	1	161	65	25.0762	0
537	1	40	7	1	0	0	0	0	0	0	0	39.9	28.6	1.3951	0	97	3.62	9.78	7.23	1.11	4.72	149	106.5	0	1	171	80	27.3588	0
538	1	52	19	0	0	1	0	0	0	0	0	27	34.5	0.782609	0	75	3.74	5.1	1.79	2.07	3.34	91	23.6	0	1	163	60	22.5827	0
539	0	54	8	0	0	0	0	0	0	0	0	40.7	31.6	1.28797	1	78	5.07	5.7	3.99	1.18	4.3	138	145.8	0	2	163	61	22.9591	0
540	1	72	25	0	0	0	0	0	0	0	0	32.5	29.6	1.09797	0	681	3	6.71	6.21	0.39	3.9	130	21.7	0	2	167	67	24.0238	0
541	0	60	15	0	0	0	0	0	0	0	0	34.3	31.2	1.09936	0	51	3.96	4.73	2.27	1.91	3.65	111	133.7	0	1	157	51	20.6905	0
542	1	49	15	0	0	0	0	1	0	0	0	43.7	29.1	1.50172	1	69	4.54	7.3	4.13	2.18	4.66	146	654.2	0	1	162	67	25.5296	0
543	0	29	15	1	1	0	0	0	0	0	0	35.9	37.4	0.959893	0	75	4.21	9.46	7.3	1.19	3.85	116	586.6	0	1	169	74	25.9095	0
544	0	44	15	0	0	0	0	0	0	0	1	40.8	28	1.45714	0	54	4.04	4.64	2.5	1.58	4.03	126	61.1	0	1	155	49	20.3954	0
545	1	34	13	0	0	1	0	0	0	0	0	41.3	35.9	1.15042	1	480	5.01	5.68	2.51	2.39	3.77	114	947.8	0	1	160	63	24.6094	0
546	1	41	18	1	0	0	0	0	0	0	0	41	31.8	1.28931	0	74	4.9	6.11	3.45	1.88	5.35	154	99	0	2	172	74	25.0135	0
547	1	52	15	1	0	0	0	0	0	0	1	38.4	32.6	1.17791	0	275	3.36	4.65	2.86	1.28	4.2	132	42.5	0	2	172	68	22.9854	0
548	0	44	15	0	0	1	0	0	0	0	0	34.6	36.8	0.940217	0	92	4.03	14.9	11.6	1.64	4.14	126	2136.4	0	2	159	52	20.5688	0
549	0	54	20	0	0	0	0	0	0	0	0	37.6	35.2	1.06818	0	80	3.99	8.41	5.05	2.72	3.78	126	10	0	2	170	70	24.2215	0
550	0	60	12	1	0	0	0	0	0	1	0	40.6	33.5	1.21194	0	247	4.46	5.72	3.9	1.25	3.47	99	59.3	0	2	158	48	19.2277	0
551	0	53	10	1	0	0	0	1	0	0	0	39.8	28.7	1.38676	0	66	6	6.15	2.87	2.75	4.81	133	215.1	0	1	157	58.5	23.7332	0
552	1	50	8	1	0	0	0	1	0	0	0	37.6	32.2	1.1677	0	78	5.09	5.6	2.47	2.25	4.49	139	35	0	2	175	85	27.7551	0
553	0	49	17	1	0	0	0	0	0	0	1	37	32.5	1.13846	0	68	3.29	4.53	2.59	1.42	3.95	114	174	0	1	162	58	22.1003	1
554	1	63	15	0	0	0	0	0	0	0	1	41.5	23.4	1.7735	0	109	3.88	3.68	1.73	1.48	4.19	137	41.7	0	2	160	55	21.4844	0
555	0	40	10	1	0	0	0	0	0	0	0	42.5	23	1.84783	0	71	3.45	4.15	2.48	1.46	4.53	135	21.5	0	1	160	55	21.4844	0
556	0	62	13	1	0	0	0	0	0	0	0	35.4	33.3	1.06306	1	45	4.01	3.55	1.65	1.48	3.3	98.7	1137.2	1	2	166	60	21.7738	0
557	0	61	15	1	0	0	0	0	0	0	0	37.9	29.6	1.28041	1	56	4.38	4.37	1.62	2.04	3.72	112	1717.4	1	2	152	54	23.3726	0
558	0	57	15	0	0	0	0	0	0	0	0	38.3	28.7	1.33449	0	85	5.95	6.3	3.45	2.24	4.38	136	156	0	2	158	68	27.2392	0
559	1	37	15	0	0	0	0	0	0	0	0	40.3	29.3	1.37543	0	79	3.77	7.5	4.01	2.45	4.74	151	431.3	0	1	164	68	25.2826	0
560	0	52	11	1	0	0	0	1	0	0	1	38.6	23.6	1.63559	0	72	3.9	4.17	1.99	1.6	3.71	114	43.2	0	2	150	46	20.4444	0
561	0	52	10	0	0	0	0	1	0	0	0	43.1	29.7	1.45118	0	58	4.99	5.75	3.31	1.83	5.12	151	161.1	0	1	160	69	26.9531	0
562	1	49	8	1	0	1	0	0	0	0	1	34.4	35	0.982857	0	518	2.73	6.14	4.32	0.96	3.09	97	63	0	1	163	64	24.0882	0
563	0	56	15	0	0	0	0	0	0	0	1	39.4	27.7	1.42238	0	78	4.07	4.56	2.01	1.98	4.46	134	41.8	0	2	155	55	22.8928	0
564	0	67	15	1	0	0	0	1	0	0	0	39.7	26.3	1.50951	0	59	5.45	5.99	3.57	1.94	4.43	130	248.8	0	2	166	63	22.8625	0
565	1	25	12	0	0	0	0	0	0	0	0	42.1	23.4	1.79915	0	62	3.57	9.83	5.88	3.23	4.7	147	285	0	1	178	72	22.7244	0
566	1	42	15	1	0	0	0	0	0	0	0	36.1	33	1.09394	1	108	4.11	5.89	3.84	1.45	4.53	137	11403.9	1	1	170	68	23.5294	0
567	1	32	12	1	0	0	0	0	0	0	1	43	31	1.3871	0	93	3.34	4.94	1.93	2.18	5.06	157	17	0	1	169	65	22.7583	0
568	0	55	13	0	1	0	0	0	0	0	0	37.3	41.4	0.900966	1	325	5.46	9.22	7.68	1.18	2.74	81	1465.2	1	2	170	71	24.5675	0
569	0	45	8	1	0	0	0	0	0	0	0	39.8	26.3	1.51331	0	78	4.64	4.78	2.2	2.18	3.57	85	238.4	0	1	163	56	21.0772	0
570	1	61	8	1	0	0	0	0	0	0	0	39.7	28	1.41786	0	81	4.64	7.42	3.53	3.24	4.9	156	40.1	0	2	160	59	23.0469	0
571	0	44	10	0	0	0	0	0	0	0	0	45	30.3	1.48515	0	55	4.23	4.72	2.96	1.25	4.22	132	9.7	0	1	163	56	21.0772	0
572	1	65	8	0	0	0	0	0	0	0	0	35.1	26.2	1.33969	0	72	4.04	4.01	2.03	1.29	4.4	137	11	0	1	168	66	23.3844	0
573	0	46	15	0	0	0	0	0	0	0	0	39.4	23.2	1.69828	0	61	4.36	4.84	3.27	1.16	3.78	115	73.1	0	1	163	68	25.5937	0
574	0	56	10	1	0	0	0	1	0	0	0	41.3	27.7	1.49097	0	69	3.49	4.22	2.7	1.09	4.12	121	624.9	0	1	160	62	24.2188	0
575	0	57	10.6	0	0	0	0	0	0	0	0	39.5	30.3	1.30363	0	241	4.14	5.15	2.82	1.89	3.42	94	94.2	0	2	169	62	21.7079	0
576	1	56	14	0	0	0	0	0	0	0	0	39.5	26.8	1.47388	0	95	3.99	9.7	5.57	2.84	4.89	154	31	0	2	174	77	25.4327	0
577	1	51	10	0	0	0	0	0	0	0	0	43.8	25.5	1.71765	0	98	4.64	8.09	4.62	2.79	4.62	143	13	0	1	177	84	26.8122	0
578	1	54	10	1	0	0	0	0	0	0	0	39.6	24.6	1.60976	0	132	4.37	14.5	11.4	1.99	4.44	143	58.6	0	1	157	64	25.9645	0
579	1	48	12	0	0	0	0	0	0	0	0	38	32.2	1.18012	1	92	4.77	7.57	3.68	2.87	4.74	146	389.9	0	2	177	81	25.8546	0
580	1	48	15	0	0	0	0	0	0	0	0	41.7	23.1	1.80519	0	82	4.52	8.61	4.13	3.55	5.1	157	9	0	1	177	98	31.2809	0
581	1	43	20	0	0	0	0	0	0	0	0	46.4	31	1.49677	0	74	6.08	6.37	3.54	2.23	5.26	164	250.1	0	1	173	78	26.0617	0
582	0	54	9	1	0	0	0	0	0	0	0	37.4	29.3	1.27645	0	60	5.97	7.46	4.27	2.4	4.2	127	35.6	0	2	168	70	24.8016	0
583	0	45	12	0	1	0	0	0	0	0	0	28.9	36.9	0.783198	0	94	3.61	12.7	10.1	1.47	3.53	106	412.1	0	1	161	56	21.6041	1
584	1	58	18	0	0	0	0	1	0	0	0	45	29.9	1.50502	0	112	5.18	7.53	3.96	2.27	5.04	160	48.3	0	1	170	80	27.6817	0
585	1	42	16	0	0	0	0	0	0	0	0	41.2	22.9	1.79913	0	92	4.69	5.47	2.06	2.69	4.24	133	9.4	0	1	165	58	21.3039	0
586	1	70	10	0	0	0	0	0	0	0	0	40.9	26.4	1.54924	0	115	4.87	7.07	3.83	2.12	4.08	137	35.1	0	3	158	50	20.0288	0
587	1	50	13	1	0	0	0	0	0	0	0	40.8	25.9	1.57529	1	82	3.39	6.14	3.11	2.06	5.07	157	307.3	0	2	179	86	26.8406	0
588	1	53	13	1	0	0	0	0	0	0	0	35.2	29.7	1.18519	0	98	3.31	8.56	7.11	0.87	3.79	120	9.3	0	2	160	58	22.6562	0
589	1	31	16	1	0	0	0	0	0	0	0	45.3	25.2	1.79762	0	70	5.63	9.25	5.1	3.14	4.95	147	13.1	0	1	170	76	26.2976	0
590	1	43	24	0	0	0	0	0	0	0	0	42	25.2	1.66667	0	91	4.07	4.85	2.82	1.38	4.56	148	319.5	0	1	173	78	26.0617	0
591	0	62	20	1	0	1	0	1	0	0	0	37.2	36.2	1.02762	1	68	6.21	3.68	1.7	1.54	3.75	103	513.2	0	2	155	45	18.7305	0
592	1	42	25	0	0	0	0	0	0	0	0	42.4	27.8	1.52518	0	93	5.38	8.84	5.85	1.77	4.71	149	237.1	0	2	161	64	24.6904	0
593	1	43	15	0	0	0	0	1	0	0	0	41.6	35.1	1.18519	1	150	4.17	5.34	2.64	1.87	5.2	147	4722	1	2	160	55	21.4844	0
594	0	41	20	1	0	0	0	1	0	0	0	34.9	28.7	1.21603	0	82	3.69	6.72	3.84	2.4	4.4	128	6.7	0	2	162	56	21.3382	0
595	1	60	11	0	0	0	0	0	0	0	1	35.4	36.2	0.977901	0	77	4.2	9.12	5.04	3.03	5.43	137	90.6	0	2	162	85	32.3884	0
596	1	30	13	1	0	0	0	0	0	0	0	44	31.1	1.41479	0	145	5.25	7.62	2.92	4.13	5.01	153	128.5	0	1	167	68	24.3824	0
597	1	29	7.2	0	0	0	0	0	0	0	0	42.3	21.8	1.94037	0	74	3.43	4.97	1.92	2.43	4.12	131	54.6	0	1	171	62	21.2031	0
598	1	40	20	1	0	0	0	1	0	0	0	39.7	27.7	1.43321	0	103	3.74	14.36	11.97	1.34	5.14	171	4714	1	1	166	80	29.0318	1
599	0	64	11	1	0	0	0	1	0	0	0	28.4	36.3	0.782369	0	98	3.48	6.19	4.63	1.09	3.72	107	36	0	2	160	51	19.9219	0
600	0	41	16	1	0	0	0	0	0	0	0	40.4	28	1.44286	0	67	3.36	4.14	1.62	2.1	4.21	127	12.7	0	1	151	53	23.2446	0
601	1	63	12	0	0	0	0	0	0	0	0	37.8	26.1	1.44828	1	129	2.73	5.25	4.11	0.73	3.49	116	81	0	2	162	65	24.7676	0
602	0	49	9	0	0	0	0	0	0	0	0	40.5	28.1	1.44128	0	77	4.2	3.82	2.53	0.76	4.12	130	8.2	0	1	156	55	22.6003	0
603	1	57	10	0	0	0	0	0	0	0	0	41	24.4	1.68033	1	72	4.07	3.93	2.13	1.37	4.8	150	13.5	0	2	166	65	23.5883	0
604	1	69	31	0	0	0	0	1	0	0	0	27.7	31.4	0.882166	0	698	3.61	9.2	6.3	2.01	2.33	72	45.2	0	2	157	60.5	24.5446	0
605	1	53	15	1	0	0	0	0	0	0	0	37.3	33.8	1.10355	0	171	3.81	9.39	6.01	2.16	6.26	194	79.7	0	2	166	70	25.4028	0
606	1	59	12	0	0	0	0	0	0	1	0	44.3	31	1.42903	0	72	4.67	6.66	2.77	2.98	4.7	160	95.9	0	2	172	80	27.0416	0
607	0	45	10	0	0	0	0	0	0	0	0	36.7	25.7	1.42802	0	70	2.99	4.38	2.82	0.9	3.8	113	17	0	1	148	50	22.8269	0
608	1	45	15	0	0	0	0	1	0	0	0	43.8	23.8	1.84034	0	169	3.32	3.84	2	1.47	4.49	139	10	0	1	172	87	29.4078	0
609	1	48	20	1	1	0	0	1	0	0	0	24.9	33.2	0.75	0	101	3.59	11.65	7.93	1.89	3.67	94	55.7	0	1	163	60	22.5827	0
610	0	44	10.8	0	0	0	0	1	0	0	1	43.6	23.1	1.88745	0	51	5	7.68	4.98	2.23	4.75	119	20.2	0	1	170	74	25.6055	0
611	0	58	18	0	0	0	0	0	0	0	0	36	29.9	1.20401	1	64	5.42	5.21	2.23	2.56	4.4	135	571.7	1	2	158	61.5	24.6355	0
612	0	30	15	1	0	0	0	0	0	0	0	42.3	29.3	1.44369	0	55	4.53	4.1	2.26	1.54	4.06	122	16.8	0	1	166	67	24.3141	1
613	1	69	16	0	0	0	0	1	0	0	1	41.3	24.6	1.67886	0	78	3.94	4.04	2.08	1.39	4.18	135	59.4	0	2	173	74	24.7252	0
614	1	32	13	1	0	0	0	1	0	0	1	43.7	30.5	1.43279	0	78	3.94	4.04	2.08	1.39	4.18	135	59.4	0	1	160	54	21.0938	0
615	0	67	15	1	1	1	0	0	0	0	0	32.9	33.7	0.976261	0	109	3.59	7.53	5.8	1.11	3.5	101	4789.7	0	2	159	61	24.1288	0
616	1	50	11	0	0	0	0	1	0	0	0	43	32.6	1.31902	0	65	6.88	5.51	2.13	2.98	4.79	155	66.8	0	1	170	70	24.2215	0
617	0	57	10	0	0	0	1	1	0	0	0	37.4	26.9	1.39033	0	55	2.4	3.54	1.81	1.43	3.18	108	367.2	0	2	156	50	20.5457	0
618	1	44	13.2	0	0	0	0	0	0	0	0	40.4	27	1.4963	0	83	3.94	6.28	2.71	2.78	4.63	141	12.3	0	1	167	74	26.5338	0
619	0	60	10	1	0	0	0	1	0	1	0	37.4	26	1.43846	0	51	3.49	5.15	2.61	1.98	3.61	106	210.6	0	1	158	65	26.0375	0
620	1	57	20	0	0	0	0	0	0	0	1	34.7	36	0.963889	0	148	4.49	4.63	2.49	1.65	3.75	122	70.2	0	2	161	63	24.3046	0
621	1	55	15	0	0	0	0	1	0	0	0	38.4	26.7	1.4382	0	120	2.95	6.16	4.09	1.37	4.64	134	4.2	0	1	174	77	25.4327	0
622	1	67	27	0	0	0	0	0	0	0	1	42	24.6	1.70732	0	68	3.99	7.22	2.69	2.39	4.56	148	190.3	0	2	174	74	24.4418	0
623	1	39	20	0	0	0	0	0	0	0	1	42.6	25.4	1.67717	0	98	4.77	5.59	2.83	2.16	4.64	142	53.8	0	1	170	65	22.4913	0
624	1	54	20	1	0	0	0	0	0	1	0	38.5	29.9	1.28763	1	80	3.74	5.73	2.79	2.24	5.13	168	153	0	2	153	66	28.1943	1
625	1	57	8	0	0	1	0	0	0	0	0	35.5	33.1	1.07251	0	777	3.26	7.26	5.83	0.86	3.52	103	73.4	0	2	168	80	28.3447	0
626	0	58	11.2	1	0	0	0	1	0	0	1	34.1	39	0.874359	0	78	3.38	9.66	5.89	1.18	3.96	108	202.5	0	2	161	67	25.8478	0
627	0	43	12	0	0	0	0	0	0	0	0	39.5	30.8	1.28247	0	76	3.3	5.37	3.04	1.74	3.89	116	38.8	0	2	150	43	19.1111	0
628	0	53	11.7	1	0	0	1	1	0	0	1	41.1	23.9	1.71967	0	59	4.27	4.45	2.62	1.49	4.96	124	55.8	0	2	168	81	28.699	0
629	0	66	6	1	0	0	0	0	0	0	0	38.9	29.7	1.30976	0	202	5.34	6.56	4.6	1.22	3.54	111	223	0	2	161	65	25.0762	0
630	1	59	20	0	0	0	0	1	0	0	0	39.7	23.3	1.70386	0	88	4.27	5.26	2.94	1.86	4.93	154	18	0	1	170	80	27.6817	0
631	0	56	13	1	0	0	0	0	0	0	0	41.2	35.5	1.16056	1	69	4.32	5.35	3.18	1.78	4.44	125	172	1	2	164	69	25.6544	0
632	1	43	20	0	0	0	0	0	0	0	0	35.4	30.6	1.15686	0	648	4.61	10.12	8.5	0.88	3.72	109	56.9	0	2	166	75	27.2173	0
633	0	62	7	1	0	0	0	1	0	0	0	47.7	35.7	1.33613	0	57	4.32	3.46	1.95	1.24	3.66	118	42.1	0	1	148	45	20.5442	0
634	1	49	15	1	0	0	0	0	0	0	0	47.4	25.2	1.88095	0	92	4.79	6.46	3.36	2.27	4.58	145	32.2	0	1	171	79	27.0169	0
635	1	52	16	0	0	0	0	0	0	0	0	39.4	29.5	1.33559	0	73	4.01	5.65	2.78	2.08	4.93	141	239.9	0	1	171	64	21.8871	0
636	1	38	22.4	0	0	0	0	1	0	0	0	37.2	28.3	1.31449	0	77	4.09	12.15	9.9	1.42	4.64	146	120	0	2	155	60	24.974	0
637	1	50	20	0	0	0	0	0	0	0	0	37.6	31.2	1.20513	0	109	3.66	6.33	4.01	1.74	3.56	114	25.7	0	2	160	53	20.7031	0
638	1	56	13.6	0	0	0	0	0	0	0	0	39.2	31.4	1.24841	0	109	4.03	6.26	3.25	2.32	4.65	151	41.2	0	2	168	75	26.5731	0
639	0	43	14.7	1	0	0	0	0	0	0	0	37.3	30.9	1.20712	0	44	4.67	7.19	4.12	2.54	4.13	125	23	0	1	158	65	26.0375	0
640	1	57	10	1	0	0	0	0	0	0	0	42.8	25	1.712	0	84	4.25	8.18	3.96	3.12	4.77	155	92.1	0	1	164	69	25.6544	0
641	1	42	10.7	0	0	0	0	0	0	0	0	39.1	33.6	1.16369	0	84	3.42	5.65	3.57	1.47	4.47	125	109.9	0	1	161	64	24.6904	0
642	0	48	18	0	0	0	0	1	0	0	0	38.7	24.9	1.55422	0	71	3.44	5.39	2.8	1.92	4.33	130	20.3	0	1	161	70	27.0051	0
643	0	34	10	1	0	0	0	0	0	0	0	42.1	30.6	1.37582	0	52	6.06	6.79	3.13	3.09	3.12	132	16.6	0	1	156	63	25.8876	0
644	1	64	7	0	0	0	0	1	0	0	0	37.3	29.3	1.27304	0	112	3.27	4.29	2.33	1.59	4.06	126	55	0	2	167	75	26.8923	0
645	1	63	10	1	1	0	0	1	0	0	0	34.2	36.9	0.926829	0	90	3.72	6.7	4.36	1.45	4.08	131	1708	0	2	169	60	21.0077	0
646	0	50	6	1	0	0	0	0	0	0	0	37.9	27.8	1.36331	0	74	3.69	3.58	1.7	1.44	4.2	116	109.1	0	1	157	44	17.8506	0
647	1	51	20	0	0	0	0	0	0	0	0	35.9	32.6	1.10123	0	70	4.6	8.14	4.89	2.25	4.39	134	49	0	2	165	60	22.0386	0
648	1	67	19	0	0	1	0	0	0	0	0	32.8	30.3	1.08251	0	91	4.43	4.93	2.82	1.42	4.05	128	59.3	0	2	160	60	23.4375	0
649	0	54	10.1	0	0	0	0	0	0	0	0	35.6	33.9	1.05015	0	45	5.23	4.87	1.93	2.39	4.08	120	8.3	0	2	161	58	22.3757	0
650	0	64	13	0	0	0	0	1	0	1	0	45.6	27	1.68889	0	101	6.8	7.25	5.04	1.64	4.08	119	252.1	0	1	160	65	25.3906	1
651	1	65	12	0	0	0	0	0	0	0	0	36.5	33.6	1.08631	0	119	3.71	7.03	4.07	1.81	4.36	144	7.1	0	2	172	77	26.0276	0
652	0	37	10	0	0	0	0	0	0	0	0	36.8	29.3	1.25597	0	42	3.5	6.64	3.09	2.92	3.76	127	58	0	1	160	58	22.6562	1
653	1	39	15	1	1	0	0	0	0	0	1	32.4	35.6	0.910112	1	292	2.8	4.8	2.95	1.39	3	94	14165.3	0	1	156	59	24.2439	0
654	1	59	30	1	0	0	0	0	0	0	1	38	27	1.40741	0	78	5.34	5.83	3.47	1.35	4.5	139	30.5	0	2	163	65	24.4646	0
655	1	52	12.9	0	0	0	0	1	0	0	0	40.7	31	1.3129	0	70	4.37	8.7	5.78	2.02	4.45	142	17.7	0	2	159	50	19.7777	0
656	0	50	20	1	1	0	0	0	0	0	0	31.1	33.1	0.939577	0	106	3.14	13.3	11.9	0.8	3.22	89.4	110	0	2	151	50	21.9289	0
657	1	63	20	0	0	0	0	0	0	0	0	37.4	26.5	1.41132	0	90	6.27	6.75	3.5	2.43	4.72	141	7	0	1	174	70	23.1206	0
658	0	50	14	1	0	1	0	0	0	0	1	32.2	45.7	0.704595	0	89	3.51	9.33	8.61	0.49	3.95	121	30	0	2	167	67.5	24.2031	0
659	1	52	20	0	0	0	0	0	0	0	1	38.9	24.5	1.58776	0	100	2.84	7.98	5.06	1.6	4.35	138	41.7	0	1	172	85	28.7317	0
660	0	59	21	1	0	0	0	0	0	0	0	37	31.9	1.15987	0	58	4.74	3.77	1.9	1.55	3.74	116	20.3	0	2	157	49	19.8791	0
661	0	56	15	1	1	0	0	0	0	0	0	32.3	35.8	0.902235	1	85	3.6	8.66	5.83	1.51	3.39	106	23403.7	0	2	158	60	24.0346	0
662	1	58	10.1	1	0	0	0	0	0	0	1	36.7	26.6	1.3797	0	106	3.31	7.28	4.59	2	4.93	149	5.9	0	1	168	66	23.3844	0
663	0	65	12	1	0	1	0	0	0	0	0	35.2	38.1	0.923885	0	500	4.31	9.06	7.01	1.38	2.85	86.9	4.7	0	2	148	44	20.0877	0
664	0	43	16	0	0	0	0	0	0	0	0	35.5	31	1.14516	0	61	4.48	6.64	3.46	2.57	4.41	139	16.3	0	2	160	65	25.3906	0
665	1	36	13	1	0	0	0	0	0	0	0	41.1	21.3	1.92958	0	92	3.76	3.79	1.6	1.71	5.06	148	25.1	0	1	160	72	28.125	0
666	1	58	15	0	0	0	0	1	0	0	0	42.2	27.6	1.52899	1	86	6.11	5.87	3.49	1.77	4.67	153	730.3	0	2	166	70	25.4028	0
667	0	55	17	1	0	0	0	0	0	0	1	37.1	26.5	1.4	0	61	3.28	4.16	2.36	1.4	4.33	133	9	0	1	155	60	24.974	0
668	1	61	20	0	0	0	0	1	0	1	1	38.8	33.4	1.16168	0	158	3.71	6.02	3.14	2.33	4.57	128	5.1	0	2	170	67	23.1834	0
669	0	41	20	0	0	0	0	0	0	0	1	42.5	28.9	1.47059	0	69	4.22	4.75	2.35	1.84	3.72	118	135.5	0	1	155	62	25.8065	0
670	1	45	23	1	0	1	0	0	0	0	1	36.2	35.6	1.01685	0	410	4.6	5.59	3.22	1.63	4.2	126	9.2	0	2	175	78	25.4694	0
671	1	49	10	0	0	0	0	0	0	0	0	42.7	22.7	1.88106	0	62	6.74	3.83	1.96	1.45	4.24	140	75.8	0	1	174	75	24.7721	0
672	0	57	8	0	0	0	0	1	0	0	0	44.1	34.1	1.29326	0	135	4.88	5.33	2.79	1.97	4.1	126	199.9	0	2	150	50	22.2222	0
673	1	30	14	1	0	0	0	0	0	0	0	43.7	26.9	1.62454	0	102	5.12	8.92	4.11	3.85	4.67	146	36	0	1	178	83.5	26.354	0
674	1	55	15	1	0	0	0	0	0	0	0	39.6	25.2	1.57143	1	94	3.69	3.58	1.75	1.22	4.35	134	354.1	0	2	164	65	24.1672	0
675	0	55	13	0	0	0	0	0	0	0	0	39.4	36.1	1.09141	1	80	4.32	10	7.58	1.87	3.95	119	2800.2	0	2	154	50	21.0828	0
676	1	45	20	0	0	0	0	0	0	0	0	40.3	27.2	1.48162	0	83	4.36	7.43	4.25	2.19	4.81	155	747.7	0	1	170	80	27.6817	0
677	1	55	33	1	0	0	0	0	0	0	1	34.5	25.7	1.34241	0	90	3.61	6.51	4.26	1.65	3.83	137	216.9	0	2	168	67	23.7387	0
678	1	41	12	1	1	0	0	0	0	0	0	36.7	40.7	0.90172	0	111	4.45	10.1	6.74	1.99	4.11	126	290.2	0	1	175	77	25.1429	0
679	0	66	20	0	0	0	0	1	0	0	0	38	26.6	1.42857	1	76	4.32	4.52	2.64	1.57	4.16	115	999.9	1	2	163	60	22.5827	0
680	1	48	18	0	0	0	0	0	0	0	0	42.9	27.8	1.54317	0	119	4.57	8.95	6.18	1.82	4.03	132	20.5	0	1	161	52	20.061	0
681	1	44	18	1	0	0	0	0	0	0	1	42.5	26.3	1.61597	0	97	4.43	6.31	2.94	2.61	4.85	146	7.6	0	1	152	67	28.9993	0
682	1	30	10	0	0	0	0	0	0	0	0	38.6	26.1	1.47893	0	76	3.9	6.49	4.05	1.85	4.65	139	184	0	1	170	63	21.7993	0
683	0	51	20	1	0	0	1	0	0	0	0	36.8	35.3	1.04249	0	72	5.69	13.32	8.46	3.22	4.1	121	23.8	0	1	155	52	21.6441	0
684	1	44	12	1	0	0	0	0	0	0	1	40.5	25.1	1.61355	0	96	2.78	3.76	1.95	1.44	5.14	162	35.7	0	1	173	68	22.7204	0
685	0	59	8	0	0	0	0	0	0	0	0	43.9	28.7	1.52962	0	77	5	4.34	2.14	1.62	4.78	131	8.5	0	2	158	55	22.0317	0
686	1	44	20	0	0	0	0	0	0	0	0	42.7	23.8	1.79412	0	93	5	7.69	3.9	2.81	4.78	151	179.8	0	1	180	77	23.7654	0
687	1	26	13	1	0	0	0	0	0	0	0	39.3	24.2	1.62397	0	89	3.7	5.63	2.53	2.6	4.45	149	13.3	0	1	173	63	21.0498	0
688	0	57	12	0	1	1	0	0	0	0	1	35.4	42.5	0.832941	0	75	5.86	9.76	7.58	1.47	3.84	106	43.4	0	2	144	50	24.1127	0
689	1	68	35	1	0	0	0	1	0	0	0	34.7	30.4	1.14145	0	102	3.64	5.37	2.82	1.75	4.55	137	54.8	0	2	159	60	23.7332	0
690	0	44	20	1	0	0	0	0	0	0	0	34.3	31.5	1.08889	1	48	3.43	5.43	3.22	1.92	3.66	116	5134.3	0	1	160	62	24.2188	0
691	0	77	20	0	0	1	0	1	0	0	1	38	28.9	1.31488	1	244	3.4	4.34	2.35	1.27	2.84	85	472.9	1	2	148	41	18.718	0
692	1	51	18	0	0	0	0	0	0	0	0	36.6	26.8	1.36567	0	87	3.38	5.3	3.08	1.28	4.53	132	25	0	1	155	54	22.4766	0
693	1	51	8	1	0	0	0	0	0	0	0	38.9	29.3	1.32765	0	58	3.24	4.73	2.36	1.72	3.43	123	42.2	0	2	161	62	23.9188	0
694	1	50	18	0	0	0	0	0	0	0	0	37.9	29.1	1.30241	0	86	3.17	6.75	4.05	2.01	4.84	149	108.4	0	1	177	78	24.8971	0
695	0	66	13	0	0	1	0	1	0	0	0	38.1	33.7	1.13056	0	58	4.81	3.88	1.47	1.68	4.52	136	43.1	0	2	159	54	21.3599	0
696	1	44	8	0	0	0	0	1	0	0	0	38.4	32.5	1.18154	0	106	4.2	8.75	5.7	2.08	5.6	166	45	0	2	174	70	23.1206	0
697	1	36	14.2	0	0	0	0	0	0	0	0	40	23.7	1.68776	0	102	3.56	5.14	2.85	1.64	5.36	153	41.7	0	1	172	66.5	22.4784	0
698	1	28	20	1	0	0	0	0	0	0	0	41.7	23.1	1.80519	0	66	3.72	5.67	2.8	2.46	4.55	138	56.9	0	1	154	50	21.0828	0
699	0	43	12	0	0	0	0	0	0	0	0	39.8	25.9	1.53668	0	54	4.48	3.59	2.26	0.96	4.29	128	1.2	0	1	158	63	25.2363	0
700	1	43	20	1	0	0	0	0	0	0	0	45.5	25	1.82	0	63	6.69	8.64	4.87	2.77	4.81	142	21.3	0	1	166	75	27.2173	0
701	1	76	14.6	0	0	0	0	0	0	0	1	42.6	25.3	1.68379	0	169	5.34	4.1	2.54	0.9	5.1	153	30.2	0	2	174	60	19.8177	0
702	1	48	15	1	0	1	0	1	0	0	0	34.6	32.9	1.05167	1	93	3.93	4.62	2.84	1.4	4.41	141	6.7	0	1	169	68	23.8087	0
703	1	49	12	1	0	0	0	0	0	0	1	37.3	30.1	1.2392	0	81	3.73	5.15	2.77	1.84	4.18	139	46.3	0	1	160	58	22.6562	0
704	0	48	15	1	0	0	0	1	0	0	1	38.7	24	1.6125	0	85	4.26	3.62	1.47	1.62	3.97	118	93.4	0	1	168	65	23.03	0
705	1	46	12	0	0	0	0	0	0	0	1	35.5	27.8	1.27698	0	517	4.78	6.71	3.67	2.45	4.49	88.7	44.4	0	1	158	50	20.0288	0
706	1	71	18	0	0	0	0	0	0	0	0	34.8	21.4	1.62617	0	79	4.08	4.4	2.16	1.79	3.76	119	12.9	0	2	167	55	19.721	0
707	0	65	15.2	1	0	0	0	1	0	0	0	42.1	33.2	1.26807	0	83	5.55	6.25	2.63	3.09	4.13	126	344.7	0	2	161	65	25.0762	0
708	1	52	20	1	0	0	0	0	0	0	0	47.6	27.7	1.71841	0	81	4.98	7.92	4.15	3.02	4.99	151	94.9	0	1	160	69	26.9531	0
709	0	60	20	1	0	1	0	0	0	0	0	29.6	30.8	0.961039	0	76	2.62	8.51	6.78	1.19	3.28	102	476.9	0	2	161	61	23.533	1
710	0	53	15	1	0	0	0	0	0	0	0	33.3	35.7	0.932773	1	123	2.75	4.46	3.03	0.95	2.93	84	835.6	0	1	155	50	20.8117	0
711	0	47	15	0	0	0	0	0	0	0	0	38.1	29.3	1.30034	0	63	3.81	5.11	3.08	1.69	4.1	110	193.3	0	1	163	82	30.863	0
712	1	38	21	1	0	0	0	0	0	0	0	32.8	34	0.964706	0	313	3.86	6.82	4.48	1.5	3.88	110	153.7	0	2	169	72	25.2092	0
713	1	40	25	1	0	0	0	0	0	0	0	39.6	21.1	1.87678	0	63	3.37	5.53	1.71	3.12	4.54	140	158.9	0	1	168	69	24.4473	0
714	1	50	15	0	0	1	0	0	0	0	0	40.4	32.2	1.25466	1	85	5.61	7.12	4.13	2.26	3.95	111	940.8	1	2	170	68	23.5294	0
715	0	39	20	0	0	0	0	0	0	0	0	39.4	31	1.27097	0	75	3.59	5.38	3.04	1.74	3.69	116	318.6	0	1	157	49	19.8791	0
716	1	38	20	1	0	0	0	0	0	0	1	42.9	24	1.7875	1	156	5.01	5.54	3.07	1.99	3.92	124	38	0	2	166	62	22.4996	0
717	1	62	25	1	0	0	0	1	0	0	1	41.3	32.2	1.28261	0	75	3.79	7.09	3.43	2.73	5.21	149	89.1	0	2	175	77	25.1429	1
718	0	55	13	1	1	0	0	1	0	0	0	30.5	32.2	0.947205	1	98	3.3	6.91	4.83	0.91	3.48	97.2	34019.4	1	2	155	45	18.7305	0
719	1	54	20	1	0	0	0	0	0	0	1	38.6	23.3	1.65665	0	111	3.09	7.43	5.02	1.49	4.6	145	13.5	0	1	158	43	17.2248	0
720	1	71	20	0	0	0	0	0	0	0	0	37	28.8	1.28472	0	57	4.02	5.28	2.52	1.86	4.05	132	232.3	0	2	166	56	20.3223	0
721	0	58	10	0	0	0	0	0	0	0	0	34.3	32.2	1.06522	1	58	3.98	5.71	3.89	1.29	3.83	105	731.8	1	2	158	60	24.0346	1
722	0	52	18	1	0	0	0	0	0	0	1	47.4	37	1.28108	0	60	4.95	6.79	4.31	1.94	4.57	128	35.7	0	2	158	55	22.0317	0
723	0	55	24.6	0	1	0	0	0	0	0	0	36.8	39	0.94359	0	63	4.55	10.89	8.98	1.29	3.24	95	497.8	0	2	150	51	22.6667	0
724	1	46	14	1	0	0	0	0	0	0	0	44.9	33.3	1.34835	0	111	4.67	6.54	3.44	2.04	4.72	145	40.3	0	1	171	75	25.6489	0
725	1	43	20	0	0	0	0	0	0	0	0	41	30	1.36667	0	89	4.23	4.37	2.08	1.65	4.78	141	4.6	0	1	170	60	20.7612	0
726	1	69	20	1	0	0	0	0	0	0	1	31	31.9	0.971787	0	90	3.74	5.17	2.1	2.46	4.22	135	152	0	2	178	85	26.8274	1
727	0	26	15	1	0	0	0	1	0	0	0	41.5	26.2	1.58397	0	51	4.21	3.51	1.47	1.68	3.77	110	15.4	0	1	155	60	24.974	0
728	1	30	15	1	0	0	0	0	0	0	1	40.7	29.3	1.38908	0	87	2.92	3.82	1.16	1.98	4.99	144	138.9	0	1	167	60	21.5139	0
729	0	60	11	1	0	0	0	0	0	0	1	34.1	23.8	1.43277	0	61	3.26	5.64	2.74	2.39	4.16	126	64.8	0	2	163	65	24.4646	0
730	0	60	15	1	0	0	0	0	0	0	0	40	28.6	1.3986	0	58	5.36	3.38	1.75	1.29	4.06	126	16.1	0	2	168	58	20.5499	0
731	1	43	12	0	0	0	0	0	0	0	0	38.2	26.5	1.44151	0	119	4.24	6.19	3.83	1.24	3.87	115	4.3	0	1	174	90	29.7265	0
732	0	56	8	0	1	0	0	1	0	1	0	40.4	27.8	1.45324	0	60	5.33	5.38	3.24	1.46	4.26	146	50.7	0	2	156	64	26.2985	0
733	1	46	30	0	0	0	0	0	0	0	0	36	31.4	1.1465	1	127	3.69	8	4.88	2.19	3.75	120	3328.5	0	2	158	51	20.4294	0
734	0	78	14	1	1	1	0	1	0	1	1	27	39.7	0.680101	1	58	3.68	5.88	2.93	1.99	3.97	125	871.8	0	2	164	61	22.68	0
735	1	44	20	0	0	0	0	0	0	0	0	36.6	28.2	1.29787	0	100	4.17	4.36	1.72	1.91	3.9	116	51.9	0	2	173	69.3	23.1548	0
736	1	52	15	0	1	1	0	0	0	0	0	40	31.4	1.27389	1	66	3.98	6.82	3.52	2.34	4.32	132	1130.5	0	2	166	69	25.0399	0
737	0	61	20	0	0	0	0	0	0	0	0	28	35.2	0.795455	0	309	2.95	8.88	6	1.96	3.1	94	43.6	0	2	164	60	22.3081	0
738	1	53	20	1	0	0	0	1	0	0	0	39.4	27.5	1.43273	1	96	4.21	7.42	5.03	1.68	6.05	174	226.3	1	2	178	80	25.2493	0
739	0	51	9	0	1	1	0	0	0	0	0	31.4	34.1	0.920821	0	68	2.76	6.39	5.39	0.77	3.64	96.1	1331.4	0	2	160	54	21.0938	0
740	1	55	20	0	0	0	0	0	0	0	0	39.6	24.2	1.63636	0	90	3.22	4.1	2.11	1.55	4.41	140	161	0	1	161	48	18.5178	0
741	1	44	18	0	1	1	0	1	0	1	0	27.3	37.4	0.729947	0	317	3.22	11.4	9.37	1.02	4.43	123	168.9	0	1	167	70	25.0995	0
742	0	48	22.4	0	0	0	0	0	0	0	0	33.1	37.3	0.887399	0	68	2.11	7.33	4.83	1.64	3.46	106	82.5	0	1	161	59	22.7615	0
743	0	49	10	0	0	0	0	0	0	0	0	40.6	34.3	1.18367	0	66	5.1	8.36	5.55	2.22	4.25	130	78.2	0	2	164	60	22.3081	0
744	0	66	15	0	0	0	0	1	0	0	0	38.4	32.7	1.17431	0	82	5.18	5.89	3.72	1.77	4.36	133	11.5	0	2	172	80	27.0416	0
745	0	47	13	0	1	0	0	0	0	0	0	34.4	41.9	0.821002	0	68	3.76	7.91	6.14	1.31	3.85	88	271.5	0	1	158	50	20.0288	0
